## Limits in the detection of m<sup>6</sup>A changes using MeRIP/m<sup>6</sup>A-seq

Alexa B.R. McIntyre<sup>1,2\*</sup>, Nandan S. Gokhale<sup>3</sup>, Leandro Cerchietti<sup>4</sup>, Samie R. Jaffrey<sup>5</sup>, Stacy M. Horner<sup>3,6</sup>,  
Christopher E. Mason<sup>1,7,8,9\*</sup>

<sup>1</sup>Department of Physiology and Biophysics, Weill Cornell Medicine, New York City, NY 10065

<sup>2</sup>Tri-Institutional Program in Computational Biology and Medicine, New York City, NY 10065

<sup>3</sup>Department of Molecular Genetics and Microbiology, Duke University Medical Center, Durham, NC  
27710

<sup>4</sup>Division of Hematology and Medical Oncology, Weill Cornell Medicine, New York City, NY 10065

<sup>5</sup>Department of Pharmacology, Weill Cornell Medicine, New York City, NY 10065

<sup>6</sup>Department of Medicine, Duke University Medical Center, Durham, NC 27710

<sup>7</sup>The HRH Prince Alwaleed Bin Talal Bin Abdulaziz Alsaud Institute for Computational Biomedicine, Weill  
Cornell Medicine, New York, NY 10021

<sup>8</sup>The Feil Family Brain and Mind Research Institute, Weill Cornell Medicine, New York, NY 10065

<sup>9</sup>The WorldQuant Initiative for Quantitative Prediction, Weill Cornell Medicine, New York, NY 10021

\*corresponding authors:

Alexa B.R. McIntyre, [abm237@cornell.edu](mailto:abm237@cornell.edu)

Christopher E. Mason [chm2042@med.cornell.edu](mailto:chm2042@med.cornell.edu)

### Abstract

Recent studies have revealed that many cellular mRNAs contain the modified base m<sup>6</sup>A and have suggested that various stimuli can lead to changes in m<sup>6</sup>A. The most common method to map m<sup>6</sup>A and to predict changes in m<sup>6</sup>A between conditions is methylated RNA immunoprecipitation sequencing (MeRIP-seq), through which methylated regions are detected as peaks in transcript coverage from immunoprecipitated RNA relative to input RNA. Here, we generated replicate controls and reanalyzed published MeRIP-seq data to estimate reproducibility across experiments. We found that m<sup>6</sup>A peak overlap in mRNAs varies from ~30 to 60% between studies, even in the same cell type. We then assessed statistical methods to detect changes in m<sup>6</sup>A peaks as distinct from changes in gene expression. However, we detected few changes under most conditions and were unable to detect consistent changes across studies using similar stimuli. Overall, our work identifies limits to MeRIP-seq reproducibility in the detection both of peaks and of peak changes and proposes improved approaches for analysis of peak changes.

## 37 Introduction

38 Methylation at the N6 position in adenosine ( $m^6A$ ) is the most common internal modification in  
39 eukaryotic mRNA. A methyltransferase complex composed of METTL3, METTL14, WTAP, VIRMA, and  
40 other cofactors catalyzes methylation at DRACH/DRAC motifs, primarily in the last exon (1,2). Most  $m^6A$   
41 methylation occurs during transcription (3). The modification then affects mRNA metabolism through  
42 recognition by RNA-binding proteins that regulate processes including translation and mRNA degradation  
43 (4–9). However, whether  $m^6A$  is lost and gained in response to various physiological changes remains  
44 contentious (3,10–15). To assess the evidence for proposed dynamic changes in  $m^6A$ , a reliable and  
45 reproducible method to detect changes in methylation as distinct from changes in gene expression is  
46 necessary.

47 The first and most widely-used method to enable transcriptome-wide studies of  $m^6A$ , MeRIP-seq  
48 or  $m^6A$ -seq, involves the immunoprecipitation of  $m^6A$ -modified RNA fragments followed by peak detection  
49 through comparison to background gene coverage (16,17). A second method has since been developed,  
50 miCLIP or  $m^6A$ -CLIP, which involves crosslinking at the site of antibody binding to induce mutations  
51 during reverse transcription for single-nucleotide detection of methylated bases (2,18). MeRIP-seq is still  
52 more often used than miCLIP, despite less precise localization of  $m^6A$  to peak regions of approximately  
53 50-200 base pairs that can contain multiple DRAC motifs, since it follows a simpler protocol, requires less  
54 starting material, and generally produces higher coverage of more transcripts. Antibodies for  $m^6A$  can  
55 also detect a second base modification, N<sup>6</sup>,2'-O-dimethyladenosine ( $m^6A_m$ ), found at a lower abundance  
56 than  $m^6A$  and located at the 5' ends of select transcripts (15,18). We thus refer to the base modifications  
57 detected through MeRIP-seq collectively as  $m^6A_{(m)}$ , although most are likely  $m^6A$ . As of late 2018, over  
58 fifty studies have used MeRIP-seq to detect  $m^6A_{(m)}$  in mammalian mRNA (**Supplementary Table 1**).

59 Although MeRIP-seq can reveal approximate sites of  $m^6A_{(m)}$ , it cannot be used to quantitatively  
60 measure the fraction of transcript copies that are methylated (19). Therefore, studies of  $m^6A$  variation in  
61 response to stimuli estimate differences at individual loci through changes in peak presence or peak  
62 height. Using these approaches, studies have reported changes to  $m^6A$  with heat shock, microRNA  
63 expression, transcription factor expression, cancer, oxidative stress, human immunodeficiency virus (HIV)  
64 infection, Kaposi's sarcoma herpesvirus (KSHV) infection, and Zika virus infection, including hundreds to  
65 thousands of changes in enrichment at specific sites (20–29). Statistical approaches to analysis have only  
66 recently been published and there have been no comprehensive evaluations of methods to detect  
67 changes in  $m^6A$  based on MeRIP-seq data (30,31). Thus, while these studies could suggest that  $m^6A$  is  
68 highly variable in response to diverse stimuli, they have applied inconsistent analysis methods to detect  
69 changes in  $m^6A$  and often don't control for differences in RNA expression or typical variability in peak  
70 heights between replicates. In some cases, these studies have reported  $m^6A$  changes based on simple  
71 differences in peak count (24,26,27,32). However, others have applied statistical tests or thresholds for  
72 differences in immunoprecipitated (IP) over input fraction enrichment and visual analysis of coverage

73 plots, and have reported fewer m<sup>6</sup>A changes or suggested that m<sup>6</sup>A is a relatively stable mark (33,34).  
74 Since there is noise in MeRIP-seq, multiple replicates are necessary to estimate variance and statistically  
75 identify the effects of experimental intervention, as in RNA-seq (35–37). However, only one MeRIP-seq  
76 study to date has used more than three replicates per condition (34), while ten have used only one  
77 (17,20,32,33,38–43), suggesting that most studies may not have enough power to detect changes in  
78 m<sup>6</sup>A<sub>(m)</sub>.

79 To re-evaluate the evidence for m<sup>6</sup>A<sub>(m)</sub> changes under various conditions, we first examined the  
80 variability in m<sup>6</sup>A<sub>(m)</sub> detection across replicates, cell lines, and experiments using our own negative  
81 controls (12 replicates) as well as 24 published MeRIP-seq data sets. We then defined appropriate  
82 statistical methods to detect differences in IP enrichment using biological negative and positive controls  
83 for m<sup>6</sup>A changes. We found that these methods are limited by noise, including biological variability from  
84 changes in RNA expression and technical variability from immunoprecipitation and sequencing that limits  
85 reproducibility across studies. Our results suggest that the scale of statistically detectable m<sup>6</sup>A<sub>(m)</sub> changes  
86 in response to various stimuli is orders of magnitude lower than the scale of changes reported in many  
87 studies. However, we also found that the majority of sites could be missed when using only 2-3 replicates.  
88 We use our results to propose approaches to MeRIP-seq experimental design and analysis to improve  
89 reproducibility and more accurately measure differential regulation of m<sup>6</sup>A<sub>(m)</sub> in response to stimuli. These  
90 data emphasize the need for further research and alternative assays, for example recently developed  
91 endoribonuclease-based methods (44,45) or direct RNA nanopore sequencing (46), to resolve the extent  
92 to which m<sup>6</sup>A changes in response to specific conditions.

93

## 94 **Results**

95

### 96 *Detection of peaks across replicates, experiments, and cell types*

97 The first steps in MeRIP-seq data analysis are to align sequencing reads to the genome or  
98 transcriptome of origin and to identify peaks in transcript coverage in the IP fraction relative to the input  
99 control. Several methods have been developed for MeRIP-seq peak detection, including exomePeak,  
100 MeTPeak, MeTDiff, and bespoke scripts. Another method often used for MeRIP-seq peak detection is  
101 MACS2, which was originally designed to detect protein binding sites in DNA from chromatin  
102 immunoprecipitation sequencing (ChIP-seq). We compared m<sup>6</sup>A<sub>(m)</sub> peak detection by exomePeak,  
103 MeTPeak, MeTDiff, and MACS2 (31,47–49) in seven replicates of MeRIP-seq data obtained from mouse  
104 cortices under basal conditions (34), and in 12 replicates of MeRIP-seq data we generated from human  
105 liver Huh7 cells. The intersect between all tools tested was high and we saw minimal differences in DRAC  
106 motif enrichment (**Supplementary Figure 1a**). Since MACS2 is the most commonly used tool and was  
107 previously used to compare MeRIP-seq experimental methods (42), we used MACS2 for the remainder of  
108 our analyses.

109 We next defined the threshold of detection for peaks in MeRIP-seq data in terms of coverage. For  
110  $m^6A_{(m)}$  peak detection, a transcript must be sufficiently expressed for enrichment by  $m^6A_{(m)}$  antibody and  
111 adequate sequencing coverage in both the IP and input fractions. Because previous reports have  
112 suggested that  $m^6A_{(m)}$  presence does not decrease with expression level (9), we assume that the  
113 detection of fewer peaks as read counts at a gene or peak decrease indicates inadequate coverage. To  
114 estimate the level of coverage necessary for peak detection, we analyzed the percent of genes with at  
115 least one, two, or three peaks relative to mean input transcript coverage in both the mouse cortex and  
116 Huh7 cell data (**Figure 1a**). Based on the upper shoulders of the sigmoidal curves as the percent of  
117 genes with peaks begins to plateau, we estimate that gene coverage of approximately 10-50X is  
118 necessary to avoid missing peaks based on insufficient coverage. Input RNA-seq coverage of peak  
119 regions alone supports a similar threshold; few peaks are detected with median input read counts below  
120 10 across replicates (**Supplementary Figure 1b**).

121 To evaluate the reproducibility of MeRIP-seq data, we next examined the consistency of  $m^6A_{(m)}$   
122 peak calling between replicates. Previous studies have reported that peak overlap between replicates is  
123 approximately 80% (9,16,50,51). Similarly, we found that between two replicates,  $\log_2$  enrichment of IP  
124 over input reads at detected peaks showed a Pearson correlation of approximately 0.8 to 0.86  
125 (**Supplementary Figure 1c**, top). A single replicate captured a median of 78% of the peaks found in  
126 seven replicates of mouse cortex data and 67% of peaks found in twelve replicates of Huh7 cell data. The  
127 number of detected peaks increased log-linearly with the addition of more replicates, such that with three  
128 replicates, 84-92% of the peaks found with 7-12 replicates were detected (**Figure 1b**, top). Conversely,  
129 the number of peaks in common across replicates decreased as the number of replicates increased, such  
130 that while ~80% of peaks were detected in at least two replicates, only ~60% were detected in six  
131 replicates for both data sets and ~30% in all twelve replicates of Huh7 cell data (**Figure 1b**, bottom).  
132 Detection of peaks in more replicates did not increase DRAC motif enrichment (**Supplementary Figure**  
133 **1c**, bottom). These results suggest that many  $m^6A_{(m)}$  sites may be missed in studies that use one to three  
134 replicates, and that increasing replicates could enable detection of more peaks. However, not all peaks  
135 correspond to true  $m^6A_{(m)}$  sites. A recent reanalysis found that at least one published data set lacked  
136 enrichment for the canonical DRAC motif under MeRIP-seq peaks, suggesting a high ratio of false to true  
137 positives (3).

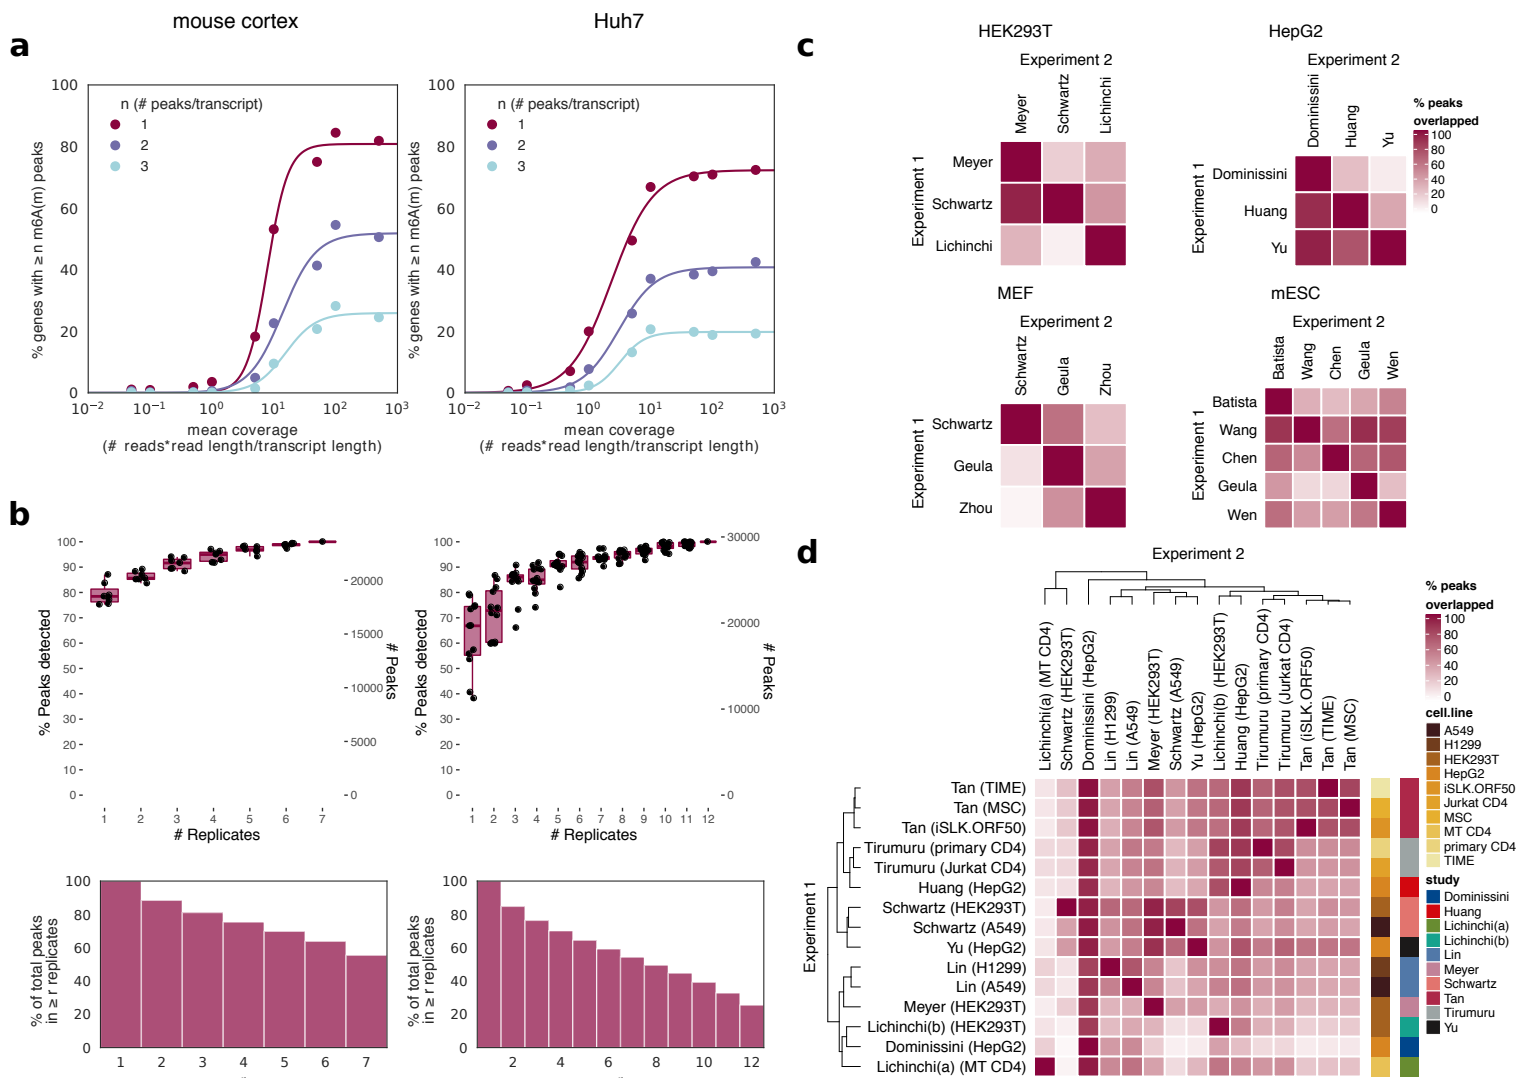

**Figure 1: Thresholds and reproducibility of peak detection.** **a)**  $m^6A_{(m)}$  site detection in MeRIP-seq data from mouse cortex (left) and human liver cells (Huh7, right) shows saturation of peak detection as transcript coverage approaches 10-50X for replicates at basal conditions, with peaks merged from all replicates. **b)** The total number of peaks captured increases with more replicates, with single replicates capturing a median of 67-79% of total peaks depending on study. Boxes span the 1<sup>st</sup> to 3<sup>rd</sup> quartiles of distributions for random subsamples of replicates, with lines indicating the median number of peaks, and whiskers showing the minimum and maximum points within  $\pm 1.5x$  the interquartile distance from the boxes. Jittered points show results for each random subsample (a total of 6 subsamples per replicate number for the mouse cortex data and 12 for the Huh7 data). **c)** Peak detection between studies that used the same cell type shows variable overlap. Overlap was calculated as the percent of peaks detected in Experiment 1 with an overlap of  $\geq 1$  base pair with peaks from Experiment 2. **d)** Peak detection across tissue and cell types shows samples from the same study cluster better together than samples from the same tissue. Studies used in (c) and (d) are described in **Supplementary Table 2**.

138 The number of peaks detected across studies varies. Given that coverage affects peak detection,  
 139 we hypothesized that variation in sequencing depth could contribute to differences in peak count. Zeng et  
 140 al. (2018) reported that peak count begins to saturate by around 20 million reads by subsampling data

141 within individual studies(42). However, we found that there is no positive correlation between peak count  
142 and input or IP sequencing depth across data sets from different published studies, each of which had 3-  
143 81M reads per replicate (input Pearson's  $R = -0.37$ ,  $p = 0.015$ ; IP Pearson's  $R = -0.18$ ,  $p = 0.24$ )  
144 (**Supplementary Table 2, Supplementary Figure 1d**). This implies that other experimental factors  
145 contribute to the variability of peak counts across studies.

146 We next analyzed the overlap of peaks among studies and found similar inconsistency in peak  
147 localization on transcripts. Within four commonly used cell types, the percent of peaks detected in one  
148 experiment that were also detected in a second varied among pairs of studies from as low as 2% of peaks  
149 to as high as 90%, filtering for transcripts expressed above a mean of 10X input coverage in both (**Figure**  
150 **1c**, there were insufficient shared transcripts at 50X for most combinations to use that threshold). In fact,  
151 peaks showed higher overlap within different cell types from the same study than within the same cell  
152 type from different studies, suggesting that MeRIP-seq data is prone to strong batch effects (**Figure 1d**).  
153 We were unable to identify a link between peaks called and differences among experimental protocols  
154 used (summarized in **Supplementary Table 2**). Overall, most percent overlaps of  $m^6A_{(m)}$  peaks fell  
155 between ~30% (1<sup>st</sup> quartile) and ~60% (3<sup>rd</sup> quartile). These results thus suggest that multiple labs running  
156 MeRIP-seq on the same cell type will not detect the same  $m^6A_{(m)}$  sites.

157

#### 158 *Detection of changes in peaks between conditions*

159 Following  $m^6A_{(m)}$  peak detection, many studies seek to compare the expression of peaks between  
160 two conditions. Looking at plots of IP and input gene coverage under different conditions can help  
161 evaluate the evidence for peak changes (33), however, statistical or heuristic methods are necessary to  
162 narrow down a list of candidate sites to plot. Several tools used for statistical analysis by the studies in  
163 **Supplementary Table 1** or for other types of RNA IP sequencing assays model peak counts using either  
164 (a) the Poisson distribution, in which the variance of a measure (here, read counts) is assumed to be  
165 equal to the mean (MeTDiff), or (b) the negative binomial distribution, in which a second parameter allows  
166 for independent adjustment of mean and variance (QNB and two implementations of a generalized linear  
167 model approach using DESeq2 or edgeR, **Table 1**) (30,31,52–54). In the mouse cortex and Huh7 cell  
168 data, we found that, similar to RNA-seq data (24,53,55), the variance in read counts under peaks  
169 exceeded their mean, indicative of overdispersion (**Supplementary Figure 2a**). The log likelihood (the  
170 probability of an observation given a distribution with known parameters) for our sample also fell within  
171 the distribution of expected log likelihoods for the negative binomial distribution (bottom) but not the  
172 Poisson distribution (top) (**Figure 2a**). Thus, the negative binomial distribution captures the mean-  
173 variance relationship in MeRIP-seq data, suggesting that tools that account for overdispersion better  
174 model the distribution of read counts at  $m^6A_{(m)}$  peaks than tools that do not.

175

176

177 **Table 1:** Statistical methods for the detection of peak changes

| Method                       | Read count distribution | Publication                 |
|------------------------------|-------------------------|-----------------------------|
| MeTDiff                      | Poisson                 | Cui et al. (2018)           |
| Quad-negative binomial (QNB) | Negative binomial       | Liu et al. (2017)           |
| GLM (DESeq2)                 | Negative binomial       | based on Park et al. (2014) |
| GLM (edgeR)                  | Negative binomial       | method for HITS-CLIP        |

178

179 We next defined positive and negative controls to evaluate tool performance for detection of  
180 changes in  $m^6A_{(m)}$  peaks. Past evaluations of methods have used data sets in which methylation  
181 machinery genes or the methyl donor were disrupted compared to baseline conditions as positive  
182 controls, and have simulated negative controls by randomly swapping labels in the positive controls  
183 (30,31). However, swapping labels for conditions that may feature differences in gene expression in  
184 addition to  $m^6A$  levels could unrealistically increase variance in read counts within groups. Therefore, we  
185 instead used the two data sets from mouse cortex and Huh7 cells, which each comprised many replicates  
186 at baseline conditions ( $n=7$  and  $n=12$ , respectively), as negative controls. We randomly divided the  
187 mouse cortex data into two groups of three replicates for comparison and divided the Huh7 replicates by  
188 lab of incubation, which did not affect sample clustering (**Supplementary Figure 2b**). We would expect to  
189 see minimal changes in IP enrichment at  $m^6A$  peaks between groups for our negative controls, whereas  
190 our positive controls, which featured genetic or chemical interference with the  $m^6A$  machinery, should  
191 show discernible differences in peaks (summarized in **Supplementary Table 3**).

192 When we compared the negative and positive controls, we found that the percent of peak  
193 changes called below a p-value threshold of 0.05 were similar (**Figure 2b**). With all tools except MeTDiff,  
194 a knockout of *Mettl3* showed the largest effects on  $m^6A$  (56), while fewer significant peaks in other  
195 positive controls suggested variable effects of the positive control conditions on  $m^6A_{(m)}$ , possibly related to  
196 knockdown or overexpression efficiency (7,33,57–61). In the absence of true differences between groups,  
197 p-value distributions should be uniform for well-calibrated statistical tests, meaning that ~5% of peaks  
198 should have p-values  $< 0.05$  for the negative controls. MeTDiff reported an excess number of sites with p-  
199 values below 0.05 (**Supplementary Figure 2c**) and identified a higher percentage of sites as differentially  
200 methylated in the mouse cortex negative control data set than in all but two positive controls (**Figure 2b**).  
201 By contrast, the generalized linear models (GLMs) and QNB showed uniform to conservatively shifted p-  
202 value distributions, with differences between the mouse cortex and Huh7 data sets (**Supplementary**  
203 **Figure 2c**), suggesting fewer false positives than MeTDiff.

204

205

206

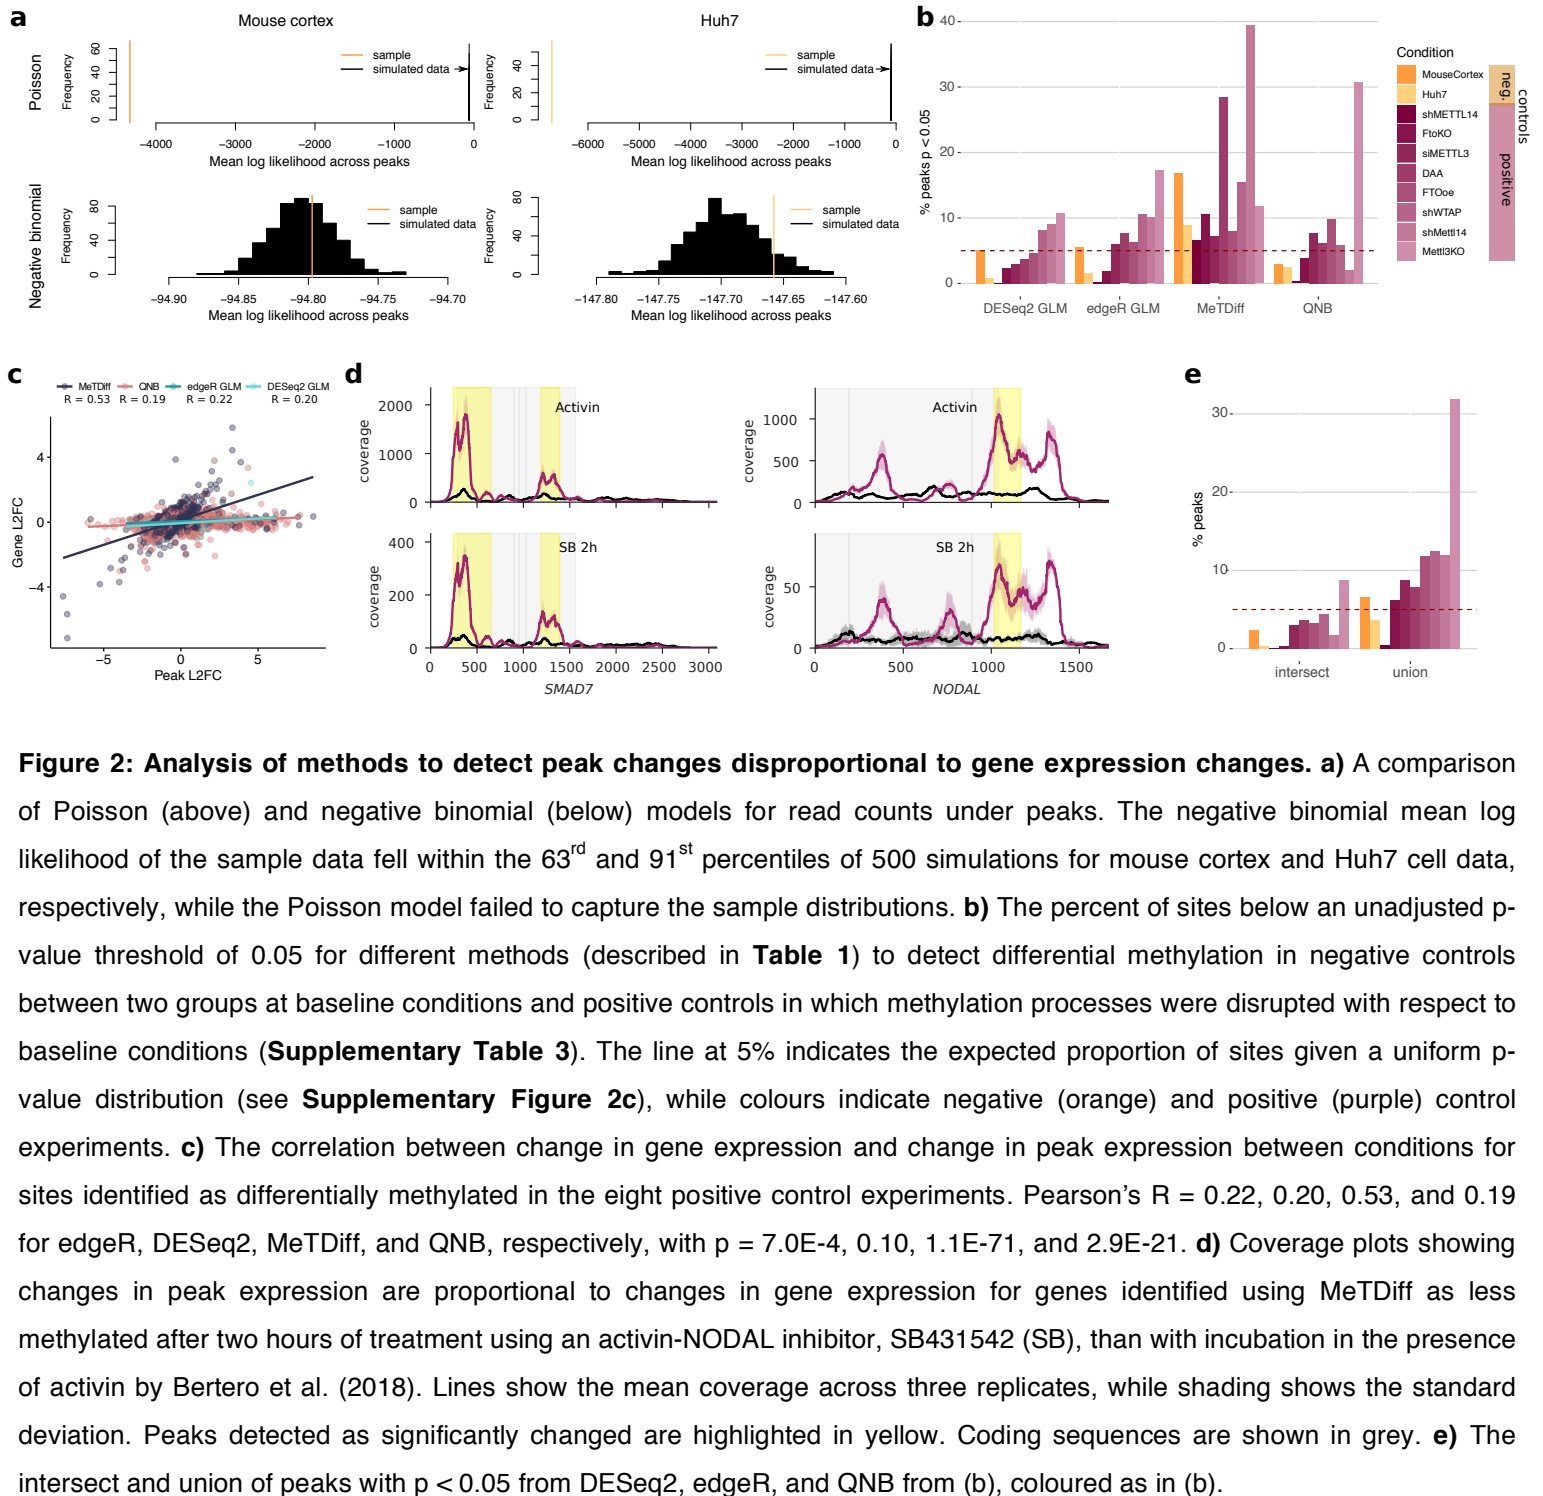

**Figure 2: Analysis of methods to detect peak changes disproportionate to gene expression changes. a)** A comparison of Poisson (above) and negative binomial (below) models for read counts under peaks. The negative binomial mean log likelihood of the sample data fell within the 63<sup>rd</sup> and 91<sup>st</sup> percentiles of 500 simulations for mouse cortex and Huh7 cell data, respectively, while the Poisson model failed to capture the sample distributions. **b)** The percent of sites below an unadjusted p-value threshold of 0.05 for different methods (described in **Table 1**) to detect differential methylation in negative controls between two groups at baseline conditions and positive controls in which methylation processes were disrupted with respect to baseline conditions (**Supplementary Table 3**). The line at 5% indicates the expected proportion of sites given a uniform p-value distribution (see **Supplementary Figure 2c**), while colours indicate negative (orange) and positive (purple) control experiments. **c)** The correlation between change in gene expression and change in peak expression between conditions for sites identified as differentially methylated in the eight positive control experiments. Pearson’s R = 0.22, 0.20, 0.53, and 0.19 for edgeR, DESeq2, MeTDiff, and QNB, respectively, with  $p = 7.0E-4$ , 0.10,  $1.1E-71$ , and  $2.9E-21$ . **d)** Coverage plots showing changes in peak expression are proportional to changes in gene expression for genes identified using MeTDiff as less methylated after two hours of treatment using an activin-NODAL inhibitor, SB431542 (SB), than with incubation in the presence of activin by Bertero et al. (2018). Lines show the mean coverage across three replicates, while shading shows the standard deviation. Peaks detected as significantly changed are highlighted in yellow. Coding sequences are shown in grey. **e)** The intersect and union of peaks with  $p < 0.05$  from DESeq2, edgeR, and QNB from (b), coloured as in (b).

207 To ensure significant peaks detected by each of the tools reflected changes in IP enrichment  
 208 independent of differential gene expression, we measured the correlation between changes in IP read  
 209 counts at peak sites and changes in input read counts across their encompassing genes. For significant  
 210 peaks (FDR-adjusted p-value  $< 0.05$ ) from the positive controls, correlation between  $\log_2$  fold change in



211 peak IP and gene input read counts was low for the GLMs and QNB (Pearson's  $R = 0.18$  to  $0.21$ ,  $2.9E-21$   
212  $< p < 0.1$ ) but reached  $0.53$  ( $p = 2.3E-74$ ) for MeTDiff (**Figure 2c**). The higher correlation for MeTDiff was  
213 driven by peaks with proportional changes in IP and input levels, which suggests that MeTDiff often  
214 detects differential expression of methylated genes rather than differential methylation and is therefore of  
215 relevance for published studies that have used MeTDiff (22,62). Plotting coverage for genes reported as  
216 differentially methylated in one of these studies with the y-axis scaled separately per condition confirmed  
217 that changes in  $m^6A$  identified by MeTDiff were proportional to changes in gene expression (**Figure 2d**)  
218 (22). Given these results, QNB or the GLM implementations are better methods than MeTDiff to detect  
219 differential methylation. Taking the intersect of significant peaks for the GLMs and QNB may help  
220 determine the most probable sites, while taking the union of predictions provides a less conservative  
221 approach to selecting sites for further validation (**Figure 2e**). However, there were still significant peaks  
222 for which the difference between peak  $\log_2$  fold change and gene  $\log_2$  fold change was close to zero,  
223 particularly with QNB (**Supplementary Figure 2d**). For the remainder of our analyses, we therefore  
224 added a filter to the combined predictions from QNB and the two GLMs for difference in peak and gene  
225  $\log_2$  fold change  $\geq 1$ , with an additional filter where noted for peak read counts  $\geq 10$  across all replicates  
226 and conditions to ensure sufficient coverage for peak detection.

227

#### 228 *Reanalyzing peak changes between conditions*

229 We next estimated the scale of statistically detectable peak changes under various conditions  
230 using our approaches and compared these results to previously reported estimates of these changes  
231 (**Figure 3a, Supplementary Table 4**). We identified fewer peaks as differentially methylated than  
232 originally reported under most conditions, with zero to hundreds of peaks significantly changed  
233 (depending on experiment and method), versus hundreds to over ten thousand described in publications  
234 (22–26,34,59,62–66). Notably, knockdown of *Zc3h13* did appear to disrupt  $m^6A_{(m)}$ , suggesting the gene  
235 does participate in methylation as recently suggested (64). Another study reported that activin treatment  
236 of human pluripotent stem cells led to differential methylation of genes that encode pluripotency factors  
237 (22). However, our reanalysis found few peak changes that passed our filters for significance, fold  
238 change, and expression (minimum input read count across peaks  $\geq 10$ ) and no enrichment for  
239 pluripotency factors among affected genes. Without the thresholds for fold change and expression, the  
240 adjusted p-value for enrichment of the KEGG pathway “signaling pathways regulating pluripotency of  
241 stem cells” dropped to 0.15 based on three genes, *LEFTY2*, *FZD28*, and *FGFR3* (**Supplementary**  
242 **Figure 3a**). Interestingly, the minimum read threshold made a particularly dramatic difference in the case  
243 of a recent study that looked at the effects of knocking down the histone methyltransferase *SETD2* on  
244  $m^6A$  in mRNA, with 2064/2065 sites predicted by QNB falling below that threshold due to low input  
245 coverage in the first and second replicates (**Supplementary Figure 3b-e**) (65). We could not compare  
246 our approach to results reported by Su et al. (2018), who found 6,024 peaks changed with R2HG

247 treatment, Zeng et al. (2018), who found 465-599 peaks changed between tumour samples, or Ma et al.  
248 (2018), who found 12,452 peaks were gained and 11,192 lost between P7 and P20 mouse cerebella, as  
249 each relied on a single replicate per condition (40–42).

250 Multiple studies have investigated  $m^6A_{(m)}$  in the context of heat shock, HIV infection, KSHV  
251 infection, and dsDNA treatment or human cytomegalovirus (HCMV) infection (**Supplementary Table 5**).  
252 Since each step in MeRIP-seq analysis risks introducing false negatives, we cannot rule out consistent  
253 changes between studies that used similar experimental interventions based on statistical detection  
254 alone. Therefore, we plotted coverage for specific genes reported as differentially methylated to evaluate  
255 reproducibility across these studies. Zhou, et al. (2015) reported 5' UTR methylation of *Hspa1a* with heat  
256 shock (20). Coverage was too low for untreated controls to determine if *Hspa1a* was newly methylated or  
257 newly expressed with heat shock based on our alignment of their data using STAR (67). We were also  
258 unable to detect a change in methylation of *HSPA1A* using data from other heat shock studies, including  
259 a new data set from a B-cell lymphoma cell line and a published miCLIP data set, although coverage was  
260 again low (**Figure 3b**) (4). Lichinchi, et al. (2016) reported that 56 genes showed increased methylation  
261 with HIV infection in MT4 T-cells, with enrichment for genes involved in viral gene expression (25).  
262 Specific genes, for example *PSIP1*, in which we also detected a peak using MACS2 and see a change in  
263 the peak when plotting coverage using the data from Lichinchi et al. (2016), did not show the same  
264 changes in data from two other  $CD4^+$  cell types, primary  $CD4^+$  cells and Jurkat cells (**Figure 3c**) (68). Two  
265 other studies both used MeRIP-seq to detect  $m^6A$  in *IFNB1* induced through dsDNA treatment or infection  
266 by the dsDNA virus HCMV (69,70). The different treatments, time points and use of a fibroblast cell line  
267 versus primary foreskin fibroblasts make it difficult to compare  $m^6A_{(m)}$  changes between the two  
268 experiments. Nevertheless, using QNB and the GLM approaches, we found five peaks in three genes  
269 (*AKAP8*, *SUN2*, and *TMEM140*) that showed significant changes both after 12 h of dsDNA treatment  
270 compared to untreated controls (69) and after 6 h post-HCMV infection compared to 72 h, when interferon  
271 levels have declined (70) (**Figure 3d**). Overall, we were unable to detect the same changes in  $m^6A_{(m)}$   
272 across studies of heat shock or HIV and few common changes in the response to dsDNA, but cell line-  
273 specific differences in  $m^6A_{(m)}$  regulation and differences in experimental protocols could account for some  
274 of the variability among these studies.

275 While we did not have MeRIP-seq data for two studies from exactly the same conditions and cell  
276 lines to compare, two studies both used cell lines derived from iSLK to study the effects of KSHV on host  
277  $m^6A$  (27,28). Both suggested that KSHV infection could decrease the number of  $m^6A$  sites in host  
278 transcripts. Hesser et al. (2018) found that lytic KSHV infection decreased the number of peaks on host  
279 transcripts by >25%; Tan et al. (2018) suggested a loss of 17-59% of peaks in two different cell types, but  
280 that  $m^6A_{(m)}$  peak fold enrichment showed better clustering by cell type than by infection status. Neither  
281 discussed specific genes that showed differential methylation with lytic infection. For our comparison of  
282  $m^6A_{(m)}$  peak changes in these data sets, we identified probable changes in peaks based on statistical

283 significance using QNB or the GLMs with  $\log_2$  fold change difference between peaks and genes of  $\geq 1$ . We  
 284 detected 80 peak changes in the data from Hesser et al. (2018) and 18 in the data from Tan et al. (2018)  
 285 but found no peaks that changed in both iSLK data sets with lytic KSHV infection.

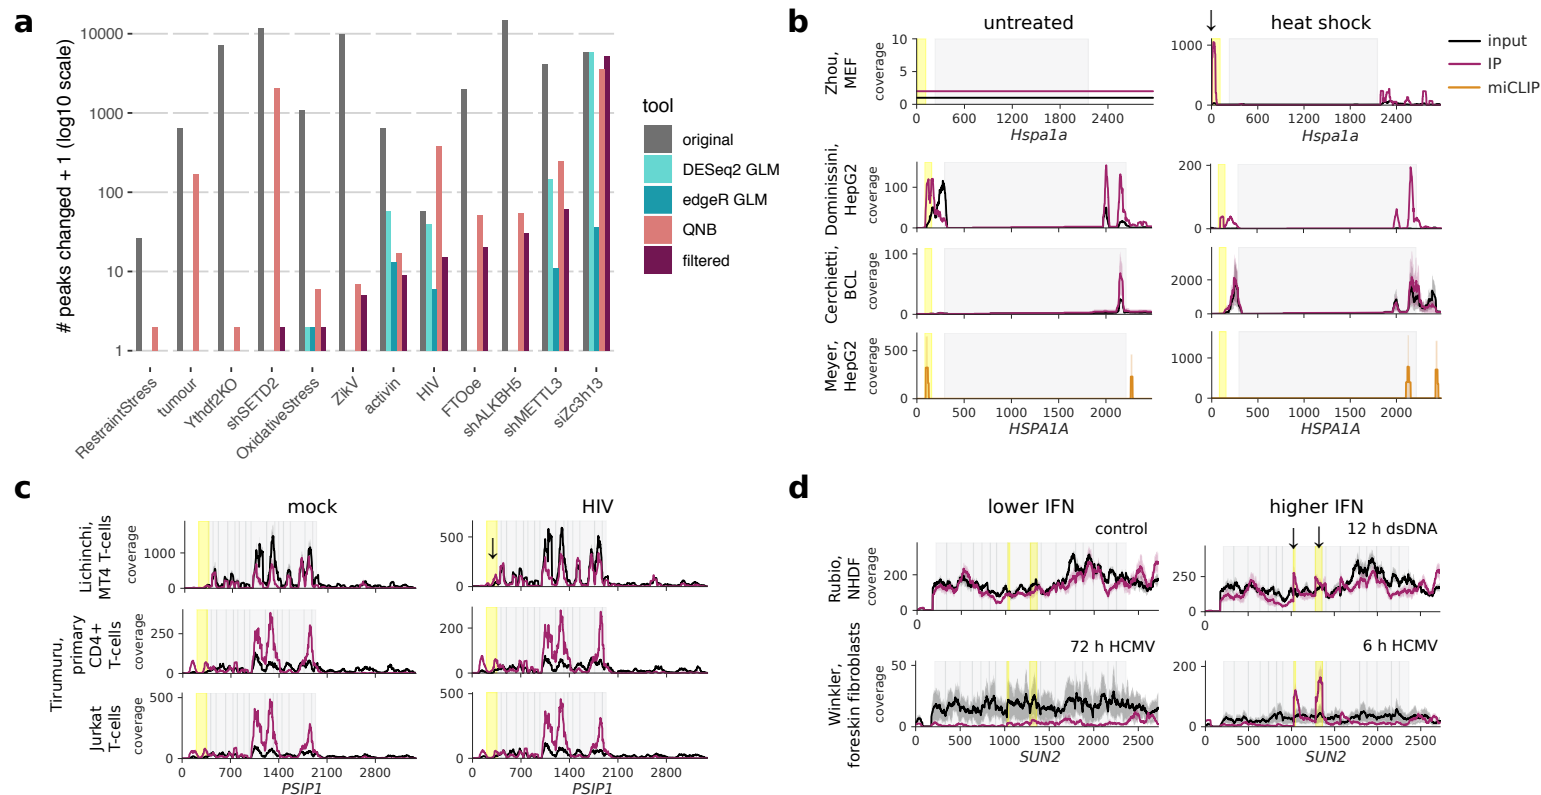

286

**Figure 3: Changes in peaks between conditions.** **a)** Detected  $m^6A_{(m)}$  changes in ten published data sets that measured  $m^6A_{(m)}$  peak changes between two conditions (**Supplementary Table 4**). The number of peaks detected as changed in the original published analyses are compared to the number of peaks with FDR-adjusted p-values  $< 0.05$  in our reanalysis using DESeq2, edgeR, or QNB, and taking the union of results from these three tools with additional filters for  $\log_2$  fold difference in peak and gene changes of  $\geq 1$  and peak read counts  $\geq 10$  across all replicates and conditions (“filtered”). **b)** Gene coverage plots for *Hspa1a* in mouse embryonic fibroblasts (MEFs) and *HSPA1A* in human cells (HepG2 and BCL) before and after heat shock. Input coverage is shown in black and IP coverage in raspberry, with putative  $m^6A$  peaks changed highlighted in yellow and marked by arrows. miCLIP coverage for an experiment in HepG2 cells is shown in orange. **c)** Coverage plots for *PSIP1*, which was reported to have a change in 5' UTR  $m^6A$  with HIV infection by Lichinchi et al (2016). **d)** Coverage plots for *SUN2*, in which we detected changes in  $m^6A$  with HCMV infection and dsDNA treatment suggesting a possible increase in methylation under higher interferon conditions. Lines in coverage plots (**b-d**) show the mean across all replicates for each experiment, while shading shows the standard deviation. Coding sequences are shown in grey.

287 *MeRIP-RT-qPCR validation*

288 Although statistical approaches revealed fewer changes in  $m^6A_{(m)}$  with various stimuli than  
289 published estimates, and we were unable to confirm changes in  $m^6A_{(m)}$  methylation of specific genes  
290 across studies of similar conditions, many of the studies we looked at do include additional validation of  
291  $m^6A_{(m)}$  changes from MeRIP-seq using MeRIP-RT-qPCR. Recently it was shown that MeRIP-RT-qPCR  
292 can capture differences in  $m^6A:A$  ratios at specific sites (34), but it is unknown how MeRIP-RT-qPCR is  
293 affected by changes in gene expression. To test this, we ran MeRIP-RT-qPCR on in vitro transcribed RNA  
294 oligonucleotides that lacked or contained  $m^6A$  spiked into total RNA extracted from Huh7 cells  
295 (**Supplementary Table 6**). We found that MeRIP-RT-qPCR was able to detect the direction of change in  
296  $m^6A$  levels at different spike-in concentrations (**Figure 4a-b**). However, technical variation could also lead  
297 to spuriously significant differences between two dilutions of in vitro controls with the same ratio of  $m^6A:A$ .  
298 For example, a comparison of  $m^6A$  enrichment between 30% methylated spike-ins at 0.1 fmol and 1 fmol  
299 returned a p-value of 0.004 (unpaired Student's *t*-test).

300 We next assessed the correlation between  $m^6A$  enrichment observed using MeRIP-seq and  
301 MeRIP-RT-qPCR using data from our recent work on changes in  $m^6A$  in Huh7 cells following infection by  
302 different viruses. For those experiments, we again selected peaks that change based on results from  
303 QNB and the GLM approaches. We found that the magnitude of changes in common among viruses  
304 correlated between MeRIP-seq and MeRIP-RT-qPCR, both across peaks (Pearson's  $R = 0.57$ ,  $p = 3.7E-$   
305  $6$ ) and within single peaks across viruses (13 out of 19 peaks showed positive correlations, four of which  
306 had p-values  $< 0.05$  with three data points) (**Figure 4c, Supplementary Figure 4**). Given the correlation  
307 we found between MeRIP-seq and MeRIP-RT-qPCR, it is unclear why changes in IP over input  
308 sequencing reads are undetectable at the peaks reported by Bertero et al. (2018) and Huang et al. (2019)  
309 but differences in peaks were successfully validated using MeRIP-RT-qPCR (22,65). While MeRIP-RT-  
310 qPCR can be used as an initial method of validation for predicted peak changes, additional methods are  
311 necessary to confirm quantitative differences in  $m^6A$  levels and to resolve points where the assays do not  
312 agree.

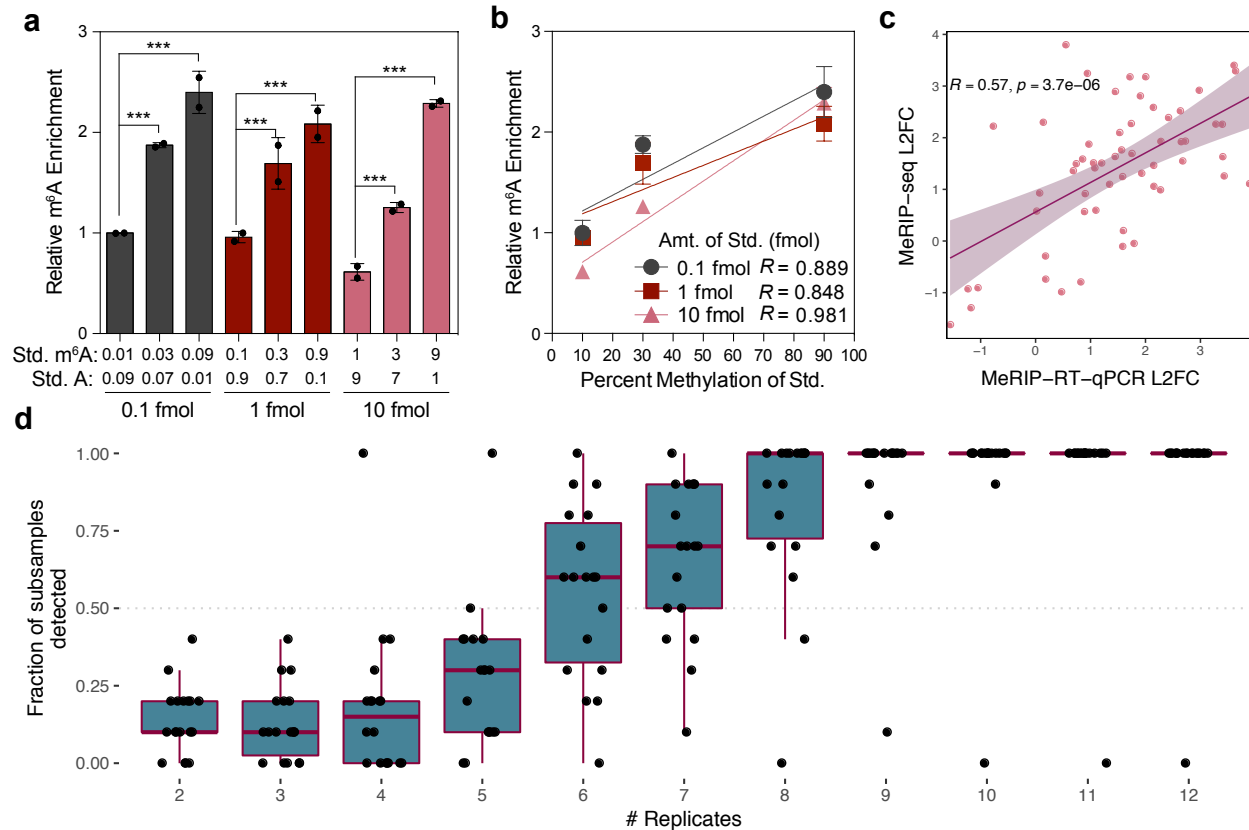

**Figure 4: MeRIP-RT-qPCR validation and replicates necessary for the detection of peak changes.** **a)** Relative enrichment of the indicated amounts of an in vitro transcribed standard containing unmodified A or m<sup>6</sup>A, as measured by MeRIP-RT-qPCR. Data are shown for two independent replicates of three technical replicates each as IP enrichment over input relative to pulldown of a positive control spike-in, with the 0.1 fmol (0.01 m<sup>6</sup>A: 0.09 A) sample normalized to 1. Bars represent mean  $\pm$  SEM of two independent replicates. \*\*\*  $p \leq 0.005$  by unpaired Student's *t*-test. **b)** Linear regression of relative m<sup>6</sup>A enrichment from (a). Points and error bars mark mean  $\pm$  SEM of two independent replicates. **c)** Change in MeRIP-RT-qPCR vs. MeRIP-seq enrichment for peaks detected as significantly differentially expressed with infection of Huh7 cells by dengue virus, Zika virus, and hepatitis C virus. **d)** Number of replicates of infected vs. uninfected cells needed to detect the peaks in (c). Replicates were randomly subsampled 10 times to calculate the fraction of subsamples in which peaks were called as significant by the GLMs or QNB. Boxes span the 1<sup>st</sup> to 3<sup>rd</sup> quartiles, with medians indicated. Whiskers show the minimum and maximum points within  $\pm 1.5x$  the interquartile distance from the boxes. Results for each subsample of replicates are shown as jittered points.

313 We next used our peaks validated using MeRIP-RT-qPCR to estimate the number of replicates  
 314 necessary for detection of changes with either the GLM or QNB methods. Using a permutation test, we  
 315 downsampled infected and uninfected replicates and reran statistical detection of changes. We found that  
 316 approximately 6-9 replicates were necessary for consistent detection (in at least 50% of subsamples) of

317 most peak changes (**Figure 4d**), suggesting that almost all published MeRIP-seq studies to date are  
318 underpowered.

319

## 320 Discussion

321 In the seven years since MeRIP-/m<sup>6</sup>A-seq was first published (16,17), many studies have used  
322 these methods to examine the function of m<sup>6</sup>A, its distribution along mRNA transcripts, and how it might  
323 be regulated under various conditions. While 35 out of 64 MeRIP- and miCLIP-seq papers we surveyed  
324 (**Supplementary Table 1**) refer to m<sup>6</sup>A as “dynamic”, and, by contrast, only two describe the modification  
325 as “static”, the literature is unclear on what is meant by the word “dynamic”. There is mixed evidence as to  
326 whether m<sup>6</sup>A is reversible through demethylation by FTO and ALKBH5 (66,71–73). While m<sup>6</sup>A does not  
327 appear to change over the course of an mRNA’s lifetime at steady-state (3), whether it changes in  
328 response to a particular stimulus and at what point is less clear. Some studies have suggested that m<sup>6</sup>A  
329 may be modulated through changes in methyltransferase and demethylase expression, producing  
330 consistent directions of change across transcripts (8,23,34), through alternative mechanisms involving  
331 microRNA, transcription factors, promoters, or histone marks (21,22,62,65,74), or through indeterminate  
332 mechanisms (17,20,25–28,50). However, based on our reanalysis of available MeRIP-seq data, there is  
333 still only meagre support for widespread changes in m<sup>6</sup>A independent of changes in the expression of  
334 methylation machinery (e.g. increases or decreases in METTL3 expression).

335 In particular, replication of peaks and changes in peaks across studies is limited. As with other  
336 RNA IP-based methods, MeRIP-seq data contains noise, owing to technical and biological variation (75).  
337 In fact, while peak overlaps reach ~80% between replicates of the same study, they decrease to a median  
338 of 45% between studies, most of which use 2-3 replicates each (**Figure 1**). Given that the detection of  
339 peaks is so variable and that peak heights differ among replicates, it is perhaps not surprising that peak  
340 changes have yet to be reproduced between multiple studies of similar conditions. Indeed, variability in  
341 MeRIP-seq could also mask differences in m<sup>6</sup>A regulation among cell types, which have been described  
342 in mouse brains (34) and in cell lines exposed to KSHV (28). To distinguish biological and technical  
343 variation, it will therefore be particularly important to test if multiple groups using the same cell line and  
344 conditions can better reproduce changes in m<sup>6</sup>A.

345 Disparities in the methods used to detect changes in m<sup>6</sup>A<sub>(m)</sub> peaks also play a role in differing  
346 conclusions among studies. Here, we analyzed four statistical methods to detect changes in peaks and  
347 found that three of these methods showed uniform or conservatively shifted p-value distributions and were  
348 able to identify changes in m<sup>6</sup>A<sub>(m)</sub> independent of changes in gene expression. We therefore suggest that  
349 these statistical methods, in combination with filters for input levels in both conditions and the difference in  
350 log<sub>2</sub> fold change between peaks and genes, can be used to identify candidate m<sup>6</sup>A<sub>(m)</sub> sites from MeRIP-  
351 seq data for further analysis and validation (**Figure 5**). Based on our results, we do not recommend  
352 MeTDiff for the detection of peak changes as it does not control well for differences in gene expression

353 **(Figure 2)**. Similar to others (33), we found that plotting predicted m<sup>6</sup>A changes was invaluable with  
354 appropriate scaling for gene coverage to reveal changes proportional to gene expression. In addition,  
355 plotting the standard deviation in transcript coverage can help assess typical variation in peak height  
356 among replicates. We note that both differential methylation of a gene and methylation of a gene that is  
357 differentially expressed could be important, but they should not be conflated when considering the role of  
358 m<sup>6</sup>A in transcript regulation.

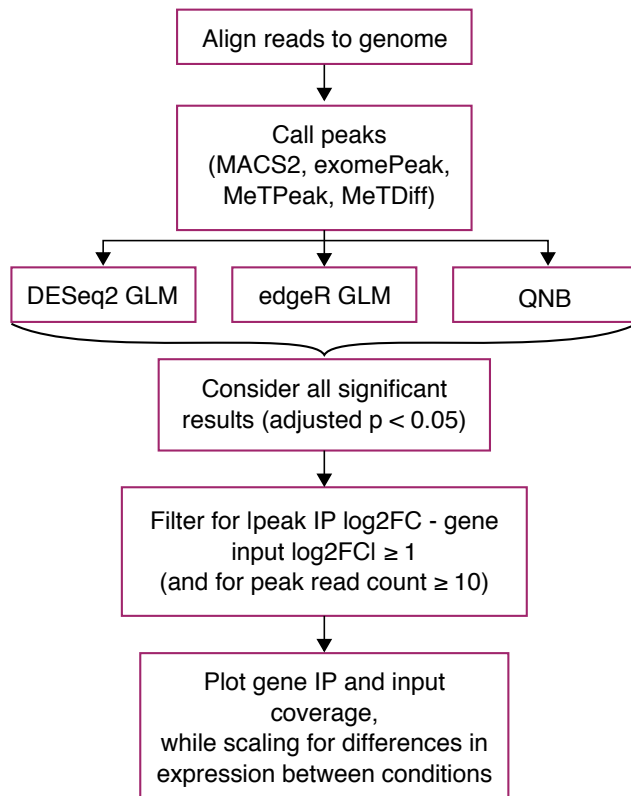

**Figure 5: Proposed approach to identify candidates for m<sup>6</sup>A<sub>(m)</sub> changes for further validation using MeRIP-seq data.**

359  
360 The extent to which m<sup>6</sup>A changes on particular transcripts and whether it changes in binary  
361 presence/absence or in degree is unclear. Although we found that MeRIP-RT-qPCR could detect  
362 differences in in vitro transcribed RNA methylation and that these changes correlated with differences in  
363 MeRIP-seq enrichment, neither MeRIP-seq nor MeRIP-RT-qPCR can reveal the precise fraction of  
364 transcript copies modified by m<sup>6</sup>A. In general, antibody-based methods are subject to biases, including  
365 from differences in binding efficiencies based on RNA structure and motif preferences (76). There is an  
366 oft-cited but little used antibody-independent method for site-specific quantification of m<sup>6</sup>A, site-specific  
367 cleavage and radioactive-labeling followed by ligation-assisted extraction and thin-layer chromatography  
368 (SCARLET) (19). However, methods that can directly detect and quantify m<sup>6</sup>A over the transcriptome are  
369 still needed (e.g. direct RNA sequencing, which has not yet been shown to accurately detect m<sup>6</sup>A across  
370 a cellular transcriptome (46)). A recently developed endoribonuclease-based approach is promising but  
371 limited to sites within DRAC motifs ending in ACA, which comprise only a third of known m<sup>6</sup>A sites

372 (44,45). Thus, endoribonuclease digestion specific to unmodified strands may enable quantitative  
373 analyses of changes in m<sup>6</sup>A:A ratios at ACA motif sites (44), but for now, site-specific SCARLET is the  
374 only option to biochemically validate proposed changes in m<sup>6</sup>A at other motifs.

375

## 376 **Conclusions**

377 Our work reveals the limits of MeRIP-seq reproducibility for the detection of m<sup>6</sup>A<sub>(m)</sub> and in  
378 particular suggests caution when using MeRIP-seq for the detection of changes in m<sup>6</sup>A<sub>(m)</sub>. To increase  
379 confidence in predicted changes in m<sup>6</sup>A<sub>(m)</sub>, we propose statistical approaches that account for differences  
380 in gene expression between conditions and variability among replicates. These methods can be used to  
381 gain insight into the regulation and function of m<sup>6</sup>A<sub>(m)</sub> and to predict specific sites for validation before the  
382 development of high-throughput alternatives to MeRIP-seq, and similar strategies may be applicable to  
383 other types of RNA sequencing assay.

384

## 385 **Methods**

### 386 *New MeRIP-seq data*

#### 387 *- Huh7 data*

388 Total RNA was extracted from Huh7 cells using Trizol (Thermo-Fisher). mRNA was purified from 200 µg  
389 total RNA using the Dynabeads mRNA purification kit (Thermo-Fisher) and concentrated by ethanol  
390 precipitation. Purified mRNA was fragmented using the RNA Fragmentation Reagent (Thermo-Fisher) for  
391 15 minutes followed by ethanol precipitation. Then, MeRIP was performed using EpiMark N6-  
392 methyladenosine Enrichment kit (NEB). 25 µL Protein G Dynabeads (Thermo-Fisher) per sample were  
393 washed three times in MeRIP buffer (150 mM NaCl, 10 mM Tris-HCl, pH 7.5, 0.1% NP-40) and incubated  
394 with 1 µL anti-m<sup>6</sup>A antibody (NEB) for 2 hours at 4°C with rotation. After washing three times, anti-m<sup>6</sup>A  
395 conjugated beads were incubated with purified mRNA with rotation at 4°C overnight in 300 µL MeRIP  
396 buffer with 1 µL RNase inhibitor (recombinant RNasein; Promega). Beads were then washed twice with  
397 500 µL MeRIP buffer, twice with low salt wash buffer (50 mM NaCl, 10 mM Tris-HCl, pH 7.5, 0.1% NP-  
398 40), twice with high salt wash buffer (500 mM NaCl, 10 mM Tris-HCl, pH 7.5, 0.1% NP-40), and once  
399 again with MeRIP buffer. m<sup>6</sup>A-modified RNA was eluted twice in 100 µL MeRIP buffer containing 5mM  
400 m<sup>6</sup>A salt (Santa Cruz Biotechnology) for 30 minutes at 4°C with rotation and concentrated by ethanol  
401 precipitation. RNA-seq libraries were prepared from eluate and the 10% of RNA set aside as input using  
402 the TruSeq mRNA library prep kit (Illumina) and checked for fragment length using the Agilent 2100  
403 Bioanalyzer. Single-end 50 base pair reads were sequenced on an Illumina HiSeq 2500.

#### 404 *- Heat shock*

405 Early passage OCI-Ly1 diffuse large B-cell lymphoma cells were grown in Iscove's modified Eagle  
406 Medium (IMDM) with 10% fetal bovine serum (FBS). OCI-Ly1 cells were obtained from the Ontario  
407 Cancer Institute and regularly tested for *Mycoplasma* contamination by PCR and identified by single



408 nucleotide polymorphism. Cells were maintained with 1% penicillin/streptomycin in a 37°C, 5% CO<sub>2</sub>,  
409 humidified incubator. In these growing conditions, heat shocked cells were exposed to 43 °C for 1 hour,  
410 followed by 1 hour of recovery at 37°C while control cells were maintained at 37°C. Following treatment,  
411 cells were processed at 4°C to obtain total cell lysates. Lysates were immunoprecipitated for m<sup>6</sup>A<sub>(m)</sub> using  
412 Synaptic Systems antibody (SYSY 202 003) following the protocol described in Meyer, et al (2012) and  
413 sequenced on an Illumina HiSeq 2500 (16).

414

#### 415 *Read processing*

416 Reads were trimmed using Trimmomatic (77) and aligned to the human genome (hg38) or the mouse  
417 genome (mm10), as appropriate, using STAR (67).

418

#### 419 *Peak detection and comparison*

420 IP over input peaks were called using MACS2 (49). Transcript coverage was estimated using Kallisto (78)  
421 with an index construct 31mers, except for the Schwartz et al (2014) data set, where the reads were too  
422 short and an alternative index based on 29mers was constructed (33). For **Figure 1b**, the full union of  
423 unique peaks was taken and the percent of that set detected in single replicates calculated. Intersects  
424 between peaks that overlapped for transcripts with ≥10X mean coverage in both samples were taken  
425 using bedtools (79) for **Figure 1c-d**, allowing a generous minimum of 1 overlapping base. Heatmaps for  
426 peak overlaps were generated using the ComplexHeatmap package in R (80). MeRIP-seq data sets in  
427 **Figure 1d** included those for human cell lines in **Figure 1c**, other data sets from the same studies and  
428 any data sets that shared the same cell lines, and other data sets that looked at multiple human cell  
429 types. We considered only data sets from baseline conditions in **Figure 1** (untreated cells and knockdown  
430 controls).

431

#### 432 *Poisson and negative binomial fits*

433 Poisson and negative binomial models were fit to input and IP read counts at peaks using maximum  
434 likelihood estimation. Simulated read counts were generated with Poisson or negative binomial  
435 distributions based on estimated parameters from the sample, with 500 random generations per model.  
436 The log likelihood of seeing read counts from the sample and the simulations given the model parameters  
437 was then calculated and the mean taken across all peaks.

438

#### 439 *Peak change detection and generalized linear models*

440 Generalized linear models to detect changes in IP coverage while controlling for differences in input  
441 coverage were implemented based on a method previously applied to HITS-CLIP data (54). Full and  
442 reduced models were constructed as follows:

443

$$\log \mu_{ij} = \beta_i^0 + \beta_i^{\text{IP}} X_j^{\text{IP}} + \beta_i^{\text{STIM}} X_j^{\text{STIM}} + \beta_i^{\text{STIM:IP}} X_j^{\text{STIM:IP}}$$
$$\log \mu_{ij} = \beta_i^0 + \beta_i^{\text{IP}} X_j^{\text{IP}} + \beta_i^{\text{STIM}} X_j^{\text{STIM}}$$

446

447 Where  $\mu_{ij}$  is the expected read count for peak  $i$  in sample  $j$ , modelled as a negative binomial distribution,  
448  $X_j^{\text{IP}} = 1$  for IP samples and 0 for input samples, and  $X_j^{\text{STIM}} = 1$  for samples under the experimental  
449 intervention and 0 for control samples.

450

451 Statistical significance was then assessed using a chi-squared test (df=1) for the difference in deviances  
452 between the full and reduced models, with the null hypothesis that the interaction term ( $\beta_i^{\text{STIM:IP}}$ ) for  
453 differential antibody enrichment driven by the experimental intervention is zero. The likelihood ratio test  
454 was implemented through DESeq2 (52) and edgeR (53), two programs developed for RNA-seq analysis  
455 that differ in how they filter data and in how they estimate dispersions for negative binomial distributions.  
456 Generalized linear models implemented through edgeR included a term for the normalized library size of  
457 sample  $j$ .

458

459 QNB was run as suggested for experiments with biological replicates, where each IP and input variable  
460 ("ip1", etc.) consisted of a matrix of peak counts for either condition 1 or condition 2:

```
461 > qnbtest(ip1, ip2, input1, input2, mode="per-condition")
```

462

463 We extracted functions from MeTDiff so that we could supply our own peaks and thus control for  
464 differences in peak detection among tools. The main post-peak calling function, `diff.call.module`, was run  
465 as follows using the same count matrices as for QNB:

```
466 > diff.call.module(ip1, input1, ip2, input2)
```

467

468 Gene and peak expression changes were estimated as  $\log_2$  fold changes from DESeq2 based on  
469 differences in input read counts aligned to genes and IP read counts aligned to peaks, respectively, and  
470 the change in peak relative to gene enrichment was calculated as the absolute difference in  $\log_2$  fold  
471 change between those values.

472

### 473 *Comparison to published studies*

474 We selected data sets for reanalysis in **Figure 3a** based on the availability of  $\geq 2$  replicates and a  
475 published estimate of the number of  $m^6A$  changes between two conditions. The sources for published  
476 estimates of  $m^6A$  peak changes included in our comparison are listed in **Supplementary Table 4**.

477 Significant (FDR-adjusted  $p < 0.05$ ) peaks were considered for DESeq2, edgeR, and QNB, run as  
478 described above. We also considered a filtered set of peaks derived from the union of significant peaks  
479 from the three tools with additional filters for location within exons,  $\log_2$  fold change between peak IP and

480 gene input  $\geq 1$ , and a minimum peak read count of 10 across replicates and conditions. We used  
481 gProfiler to calculate enrichment of functional categories using a hypergeometric test (81).

482

483 In **Figure 3b-c**, we selected *Hspa1a/HSPA1A* as our representative gene for heat shock because it was  
484 the primary example cited by Zhou et al. (2015) and Meyer et al. (2015) (4,20). For HIV, we selected  
485 *PSIP1* because it was among the 56 genes reported by Lichinchi et al. (2016a) (25), it plays a known role  
486 in HIV infection, and we detected a peak in the gene using MACS2.

487

488 For KSHV, we compared significant results (adjusted  $p < 0.05$ ) from QNB and GLMs (DESeq2 and  
489 edgeR), with additional filtering for lpeak IP – gene input  $\log_2$  fold changel  $\geq 1$  (lowering this threshold to  
490 0.5 did not change results), for data from Hesser et al. (2018) (27) in lytic vs. latent iSLK.219 cells and  
491 data from Tan et al. (2018) (28) in lytic vs. latent iSLK BAC16 cells. We used the same approach to  
492 compare data from Rubio et al. (2018) and Winkler et al. (2019) (69,70) for response to dsDNA. Data sets  
493 used for site-specific comparisons are summarized in **Supplementary Table 5**.

494

495 Gene coverage was plotted using CovFuzze (<https://github.com/al-mcintyre/CovFuzze>), which  
496 summarizes mean and standard deviation in coverage across available replicates.

497

#### 498 *Spike-in controls and MeRIP-RT-qPCR*

499 In vitro transcribed (IVT) controls were provided by the Jaffrey Lab and consisted of 1001 base long RNA  
500 sequences with three adenines in GAC motifs (**Supplementary Table 6**) either fully methylated or  
501 unmethylated.  $m^6A$  and A controls were mixed in various ratios (1:9, 3:7, and 9:1) that approximate the  
502 variation in  $m^6A$  levels detected by SCARLET ( $m^6A$  levels at specific sites have been reported to vary  
503 from 6-80% of transcripts (19)). Modified and unmodified standards were mixed at the indicated ratios to  
504 yield a final quantity of 0.1 fmol, 1 fmol, and 10 fmol. Mixed RNA standards were added to 30  $\mu$ g total  
505 RNA from Huh7 cells, along with 0.1 fmol of positive ( $m^6A$ -modified *Gaussia* luciferase RNA, “GLuc”) and  
506 negative control (unmodified *Cypridina* luciferase, “CLuc”) spike-in RNA provided with the N6-  
507 methyladenosine Enrichment kit (EpiMark). Following MeRIP as described above, cDNA was synthesized  
508 from eluate and input samples using the iScript cDNA synthesis kit (Bio-Rad), and RT-qPCR was  
509 performed on a QuantStudio Flex 6 instrument. Data was analyzed as a percent of input of the spike-in  
510 RNA in each condition relative to that of the provided positive control spike-in. Primers used for RT-qPCR  
511 were:

512 IVT\_Std\_F: TGCCTTTTCTTTTCGGTTGCG

513 IVT\_Std\_R: CAAACACAAGAAGGCACGGG

514 GLuc\_F: CGACATTCCTGAGATTCCTGG

515 GLuc\_R: TTGAGCAGGTCAGAACACTG

516 CLuc\_F: GCTTCAACATCACCGTCATTG

517 CLuc\_R: CACAGAGGCCAGAGATCATTC

518

519 *Cell culture and infection (data used for MeRIP-RT-qPCR experiments)*

520 Huh7 cells were grown in DMEM (Mediatech) supplemented with 10% fetal bovine serum (HyClone), 2.5  
521 mM HEPES, and 1X non-essential amino acids (Thermo-Fisher). The identity of the Huh7 cell lines was  
522 verified using the Promega GenePrint STR kit (DNA Analysis Facility, Duke University), and cells were  
523 verified as mycoplasma free by the LookOut Mycoplasma PCR detection kit (Sigma). Infectious stocks of  
524 a cell culture-adapted strain of genotype 2A JFH1 HCV were generated and titered on Huh7.5 cells by  
525 focus-forming assay (FFA), as described (82). Dengue virus (DENV2-NGC), West Nile virus (WNV-  
526 NY2000), and Zika virus (ZIKV-PRVABC59) viral stocks were generated in C6/36 cells and titered on  
527 Vero cells as described (82). All viral infections were performed at a multiplicity of infection of 1 for 48  
528 hours.

529

### 530 **Availability of Data and Materials**

531 MeRIP-seq data for the Huh7 negative controls is available in the GEO repository, under accession  
532 number GSE130891. MeRIP-seq data for heat shock in B-cell lymphoma is available under accession  
533 number GSE130892. Accession numbers for all other data sets reanalyzed in the study are included in  
534 Supplementary Tables 1-5. Scripts used for analyses are available at [https://github.com/al-](https://github.com/al-mcintyre/merip_reanalysis_scripts)  
535 [mcintyre/merip\\_reanalysis\\_scripts](https://github.com/al-mcintyre/merip_reanalysis_scripts).

### 536 **Competing interests**

537 C.E.M. is a cofounder and board member for Biotia and Onegevity Health, as well as an advisor or  
538 compensated speaker for Abbvie, Acuamark Diagnostics, ArcBio, BioRad, DNA Genotek, Genialis,  
539 Genpro, Karius, Illumina, New England Biolabs, QIAGEN, Whole Biome, and Zymo Research.

### 540 **Funding**

541 We are grateful for funding from the Starr Cancer Consortium (I9-A9-071), the Bert L and N. Kuggie Vallee  
542 Foundation, the WorldQuant Foundation, The Pershing Square Sohn Cancer Research Alliance, NASA  
543 (NNX14AH50G), the National Institutes of Health (R01AI125416, R21AI129851, R01MH117406), the  
544 Leukemia and Lymphoma Society (LLS) grants (LLS 9238-16, Mak, LLS-MCL-982, Chen-Kiang), the  
545 Burroughs Wellcome Fund (S.M.H.), the National Science and Engineering Research Council of Canada  
546 (A.B.R.M. PGS-D funding), and the American Heart Association (N.S.G. Pre-doctoral Fellowship,  
547 17PRE33670017).

548 **Authors' contributions**

549 A.B.R.M. and C.E.M. conceived the study. A.B.R.M. developed and ran the analyses and wrote the  
550 manuscript with N.S.G. and S.M.H. S.R.J. provided in vitro controls for MeRIP-RT-qPCR. N.S.G. prepared  
551 MeRIP-seq libraries for the Huh7 controls and ran MeRIP-RT-qPCR tests. L.C. contributed additional heat  
552 shock data. All authors read and edited the manuscript.

553 **Acknowledgements**

554 We would like to thank Christina Leslie and Jonathan Victor for statistical advice, Aashiq Mizra for the  
555 MeRIP-RT-qPCR controls, and Helen Lazear for WNV infection. We would also like to thank the  
556 Epigenomics Core at Weill Cornell for preparing MeRIP-seq libraries, the Scientific Computing Unit (SCU),  
557 and New England Biolabs for donating anti-m<sup>6</sup>A antibodies.

558 **References**

- 559 1. Balacco DL, Soller M. The m6A Writer: Rise of a Machine for Growing Tasks. *Biochemistry*. 2019;
- 560 2. Ke S, Alemu EA, Mertens C, Gantman EC, Fak JJ, Mele A, et al. A majority of m6A residues are in  
561 the last exons, allowing the potential for 3' UTR regulation. *Genes & development*. 2015;
- 562 3. Ke S, Pandya-Jones A, Saito Y, Fak JJ, Vågbo CB, Geula S, et al. m6A mRNA modifications are  
563 deposited in nascent pre-mRNA and are not required for splicing but do specify cytoplasmic  
564 turnover. *Genes & Development*. 2017;31(10):990–1006.
- 565 4. Meyer KD, Patil DP, Zhou J, Zinoviev A, Skabkin MA, Elemento O, et al. 5' UTR m6A promotes cap-  
566 independent translation. *Cell*. 2015;163(4):999–1010.
- 567 5. Wang X, Zhao BS, Roundtree IA, Lu Z, Han D, Ma H, et al. N6-methyladenosine modulates  
568 messenger RNA translation efficiency. *Cell*. 2015;161(6):1388–99.
- 569 6. Lin S, Choe J, Du P, Triboulet R, Gregory RI. The m6A methyltransferase METTL3 promotes  
570 translation in human cancer cells. *Molecular cell*. 2016;62(3):335–45.
- 571 7. Wang Y, Li Y, Toth JI, Petroski MD, Zhang Z, Zhao JC. N 6-methyladenosine modification  
572 destabilizes developmental regulators in embryonic stem cells. *Nature cell biology*. 2014;16(2):191.
- 573 8. Molinie B, Wang J, Lim KS, Hillebrand R, Lu Z, Van Wittenberghe N, et al. m 6 A-LAIC-seq reveals  
574 the census and complexity of the m 6 A epitranscriptome. *Nature methods*. 2016;13(8):692.

- 575 9. Yoon K-J, Ringeling FR, Vissers C, Jacob F, Pokrass M, Jimenez-Cyrus D, et al. Temporal control of  
576 mammalian cortical neurogenesis by m6A methylation. *Cell*. 2017;171(4):877–89.
- 577 10. Meyer KD, Jaffrey SR. Rethinking m6A readers, writers, and erasers. *Annual review of cell and*  
578 *developmental biology*. 2017;33:319–42.
- 579 11. Roundtree IA, Evans ME, Pan T, He C. Dynamic RNA modifications in gene expression regulation.  
580 *Cell*. 2017;169(7):1187–200.
- 581 12. Rosa-Mercado NA, Withers JB, Steitz JA. Settling the m6A debate: methylation of mature mRNA is  
582 not dynamic but accelerates turnover. *Genes & development*. 2017;31(10):957–8.
- 583 13. Darnell RB, Ke S, Darnell JE. Pre-mRNA processing includes N6 methylation of adenosine residues  
584 that are retained in mRNA exons and the fallacy of “RNA epigenetics.” *RNA*. 2018;24(3):262–7.
- 585 14. Zhao BS, Nachtergaele S, Roundtree IA, He C. Our views of dynamic N6-methyladenosine RNA  
586 methylation. *RNA*. 2018;24(3):268–72.
- 587 15. Mauer J, Jaffrey SR. FTO, m6Am, and the hypothesis of reversible epitranscriptomic mRNA  
588 modifications. *FEBS letters*. 2018;592(12):2012–22.
- 589 16. Meyer KD, Saletore Y, Zumbo P, Elemento O, Mason CE, Jaffrey SR. Comprehensive analysis of  
590 mRNA methylation reveals enrichment in 3' UTRs and near stop codons. *Cell*. 2012;149(7):1635–  
591 46.
- 592 17. Dominissini D, Moshitch-Moshkovitz S, Schwartz S, Salmon-Divon M, Ungar L, Osenberg S, et al.  
593 Topology of the human and mouse m 6 A RNA methylomes revealed by m 6 A-seq. *Nature*.  
594 2012;485(7397):201.
- 595 18. Linder B, Grozhik AV, Olarerin-George AO, Meydan C, Mason CE, Jaffrey SR. Single-nucleotide-  
596 resolution mapping of m6A and m6Am throughout the transcriptome. *Nature methods*.  
597 2015;12(8):767.
- 598 19. Liu N, Parisien M, Dai Q, Zheng G, He C, Pan T. Probing N6-methyladenosine RNA modification  
599 status at single nucleotide resolution in mRNA and long noncoding RNA. *Rna*. 2013;
- 600 20. Zhou J, Wan J, Gao X, Zhang X, Jaffrey SR, Qian S-B. Dynamic m 6 A mRNA methylation directs  
601 translational control of heat shock response. *Nature*. 2015;526(7574):591.

- 602 21. Chen T, Hao Y-J, Zhang Y, Li M-M, Wang M, Han W, et al. m6A RNA Methylation Is Regulated by  
603 MicroRNAs and Promotes Reprogramming to Pluripotency. *Cell Stem Cell*. 2015 Mar 5;16(3):289–  
604 301.
- 605 22. Bertero A, Brown S, Madrigal P, Osnato A, Ortmann D, Yiangou L, et al. The SMAD2/3 interactome  
606 reveals that TGF $\beta$  controls m 6 A mRNA methylation in pluripotency. *Nature*. 2018;555(7695):256.
- 607 23. Liu J, Eckert MA, Harada BT, Liu S-M, Lu Z, Yu K, et al. m 6 A mRNA methylation regulates AKT  
608 activity to promote the proliferation and tumorigenicity of endometrial cancer. *Nature cell biology*.  
609 2018;20(9):1074.
- 610 24. Anders M, Chelysheva I, Goebel I, Trenkner T, Zhou J, Mao Y, et al. Dynamic m6A methylation  
611 facilitates mRNA triaging to stress granules. *Life science alliance*. 2018;1(4):e201800113.
- 612 25. Lichinchi G, Gao S, Saletore Y, Gonzalez GM, Bansal V, Wang Y, et al. Dynamics of the human and  
613 viral m6A RNA methylomes during HIV-1 infection of T cells. *Nature Microbiology*. 2016;1.
- 614 26. Lichinchi G, Zhao BS, Wu Y, Lu Z, Qin Y, He C, et al. Dynamics of human and viral RNA methylation  
615 during Zika virus infection. *Cell host & microbe*. 2016;20(5):666–73.
- 616 27. Hesser CR, Karijolich J, Dominissini D, He C, Glaunsinger BA. N6-methyladenosine modification and  
617 the YTHDF2 reader protein play cell type specific roles in lytic viral gene expression during Kaposi's  
618 sarcoma-associated herpesvirus infection. *PLoS pathogens*. 2018;14(4):e1006995.
- 619 28. Tan B, Liu H, Zhang S, da Silva SR, Zhang L, Meng J, et al. Viral and cellular N 6-methyladenosine  
620 and N 6, 2'-O-dimethyladenosine epitranscriptomes in the KSHV life cycle. *Nature microbiology*.  
621 2018;3(1):108.
- 622 29. Vu LP, Pickering BF, Cheng Y, Zaccara S, Nguyen D, Minuesa G, et al. The N 6-methyladenosine (m  
623 6 A)-forming enzyme METTL3 controls myeloid differentiation of normal hematopoietic and  
624 leukemia cells. *Nature medicine*. 2017;23(11):1369.
- 625 30. Liu L, Zhang S-W, Huang Y, Meng J. QNB: differential RNA methylation analysis for count-based  
626 small-sample sequencing data with a quad-negative binomial model. *BMC bioinformatics*.  
627 2017;18(1):387.
- 628 31. Cui X, Zhang L, Meng J, Rao MK, Chen Y, Huang Y. MeTDiff: a novel differential RNA methylation  
629 analysis for MeRIP-seq data. *IEEE/ACM Transactions on Computational Biology and Bioinformatics*  
630 (TCBB). 2018;15(2):526–34.

- 631 32. Zhao X, Yang Y, Sun B-F, Shi Y, Yang X, Xiao W, et al. FTO-dependent demethylation of N6-  
632 methyladenosine regulates mRNA splicing and is required for adipogenesis. *Cell research*.  
633 2014;24(12):1403.
- 634 33. Schwartz S, Mumbach MR, Jovanovic M, Wang T, Maciag K, Bushkin GG, et al. Perturbation of m6A  
635 writers reveals two distinct classes of mRNA methylation at internal and 5' sites. *Cell reports*.  
636 2014;8(1):284–96.
- 637 34. Engel M, Eggert C, Kaplick PM, Eder M, Röh S, Tietze L, et al. The role of m6A/m-RNA methylation  
638 in stress response regulation. *Neuron*. 2018;99(2):389–403.
- 639 35. Zhou J, White KP, Liu Y. RNA-seq differential expression studies: more sequence or more  
640 replication? *Bioinformatics*. 2013 Dec 4;30(3):301–4.
- 641 36. Schurch NJ, Schofield P, Gierliński M, Cole C, Sherstnev A, Singh V, et al. How many biological  
642 replicates are needed in an RNA-seq experiment and which differential expression tool should you  
643 use? *Rna*. 2016;22(6):839–51.
- 644 37. Su Z, Łabaj PP, Li S, Thierry-Mieg J, Thierry-Mieg D, Shi W, et al. A comprehensive assessment of  
645 RNA-seq accuracy, reproducibility and information content by the Sequencing Quality Control  
646 Consortium. *Nature biotechnology*. 2014;32(9):903.
- 647 38. Geula S, Moshitch-Moshkovitz S, Dominissini D, Mansour AA, Kol N, Salmon-Divon M, et al. m6A  
648 mRNA methylation facilitates resolution of naïve pluripotency toward differentiation. *Science*.  
649 2015;347(6225):1002–6.
- 650 39. Cui Q, Shi H, Ye P, Li L, Qu Q, Sun G, et al. m6A RNA methylation regulates the self-renewal and  
651 tumorigenesis of glioblastoma stem cells. *Cell reports*. 2017;18(11):2622–34.
- 652 40. Ma C, Chang M, Lv H, Zhang Z-W, Zhang W, He X, et al. RNA m 6 A methylation participates in  
653 regulation of postnatal development of the mouse cerebellum. *Genome biology*. 2018;19(1):68.
- 654 41. Su R, Dong L, Li C, Nachtergaele S, Wunderlich M, Qing Y, et al. R-2HG exhibits anti-tumor activity  
655 by targeting FTO/m6A/MYC/CEBPA signaling. *Cell*. 2018;172(1–2):90–105.
- 656 42. Zeng Y, Wang S, Gao S, Soares F, Ahmed M, Guo H, et al. Refined RIP-seq protocol for  
657 epitranscriptome analysis with low input materials. *PLoS biology*. 2018;16(9):e2006092.



- 658 43. Zhou J, Wan J, Shu XE, Mao Y, Liu X-M, Yuan X, et al. N6-methyladenosine guides mRNA  
659 alternative translation during integrated stress response. *Molecular cell*. 2018;69(4):636–47.
- 660 44. Garcia-Campos MA, Edelheit S, Toth U, Shachar R, Nir R, Lasman L, et al. Deciphering the m6A  
661 code via quantitative profiling of m6A at single-nucleotide resolution. *BioRxiv*. 2019;571679.
- 662 45. Zhang Z, Chen L-Q, Zhao Y-L, Yang C-G, Roundtree IA, Zhang Z, et al. Single-base mapping of m6A  
663 by an antibody-independent method. *bioRxiv*. 2019;575555.
- 664 46. Liu H, Begik O, Lucas MC, Mason CE, Schwartz S, Mattick JS, et al. Accurate detection of m6A RNA  
665 modifications in native RNA sequences. *bioRxiv*. 2019;525741.
- 666 47. Meng J, Lu Z, Liu H, Zhang L, Zhang S, Chen Y, et al. A protocol for RNA methylation differential  
667 analysis with MeRIP-Seq data and exomePeak R/Bioconductor package. *Methods*. 2014;69(3):274–  
668 81.
- 669 48. Cui X, Meng J, Zhang S, Chen Y, Huang Y. A novel algorithm for calling mRNA m6A peaks by  
670 modeling biological variances in MeRIP-seq data. *Bioinformatics*. 2016;32(12):i378–85.
- 671 49. Zhang Y, Liu T, Meyer CA, Eeckhoute J, Johnson DS, Bernstein BE, et al. Model-based analysis of  
672 ChIP-Seq (MACS). *Genome biology*. 2008;9(9):R137.
- 673 50. He S, Wang H, Liu R, He M, Che T, Jin L, et al. mRNA N6-methyladenosine methylation of postnatal  
674 liver development in pig. *PloS one*. 2017;12(3):e0173421.
- 675 51. Tao X, Chen J, Jiang Y, Wei Y, Chen Y, Xu H, et al. Transcriptome-wide N6-methyladenosine  
676 methylome profiling of porcine muscle and adipose tissues reveals a potential mechanism for  
677 transcriptional regulation and differential methylation pattern. *BMC genomics*. 2017;18(1):336.
- 678 52. Love MI, Huber W, Anders S. Moderated estimation of fold change and dispersion for RNA-seq data  
679 with DESeq2. *Genome biology*. 2014;15(12):550.
- 680 53. Robinson MD, McCarthy DJ, Smyth GK. edgeR: a Bioconductor package for differential expression  
681 analysis of digital gene expression data. *Bioinformatics*. 2010;26(1):139–40.
- 682 54. Park S-M, Deering RP, Lu Y, Tivnan P, Lianoglou S, Al-Shahrour F, et al. Musashi-2 controls cell fate,  
683 lineage bias, and TGF- $\beta$  signaling in HSCs. *Journal of Experimental Medicine*. 2014;211(1):71–87.

- 684 55. Marioni JC, Mason CE, Mane SM, Stephens M, Gilad Y. RNA-seq: an assessment of technical  
685 reproducibility and comparison with gene expression arrays. *Genome research*. 2008;18(9):1509–  
686 17.
- 687 56. Batista PJ, Molinie B, Wang J, Qu K, Zhang J, Li L, et al. m6A RNA modification controls cell fate  
688 transition in mammalian embryonic stem cells. *Cell stem cell*. 2014;15(6):707–19.
- 689 57. Fustin J-M, Doi M, Yamaguchi Y, Hida H, Nishimura S, Yoshida M, et al. RNA-methylation-dependent  
690 RNA processing controls the speed of the circadian clock. *Cell*. 2013;155(4):793–806.
- 691 58. Hess ME, Hess S, Meyer KD, Verhagen LA, Koch L, Brönneke HS, et al. The fat mass and obesity  
692 associated gene (*Fto*) regulates activity of the dopaminergic midbrain circuitry. *Nature*  
693 *neuroscience*. 2013;16(8):1042.
- 694 59. Li Z, Weng H, Su R, Weng X, Zuo Z, Li C, et al. FTO plays an oncogenic role in acute myeloid  
695 leukemia as a N6-methyladenosine RNA demethylase. *Cancer cell*. 2017;31(1):127–41.
- 696 60. Huang H, Weng H, Sun W, Qin X, Shi H, Wu H, et al. Recognition of RNA N 6-methyladenosine by  
697 IGF2BP proteins enhances mRNA stability and translation. *Nature cell biology*. 2018;20(3):285.
- 698 61. Zhong X, Yu J, Frazier K, Weng X, Li Y, Cham CM, et al. Circadian Clock Regulation of Hepatic Lipid  
699 Metabolism by Modulation of m6A mRNA Methylation. *Cell reports*. 2018;25(7):1816–28.
- 700 62. Barbieri I, Tzelepis K, Pandolfini L, Shi J, Millán-Zambrano G, Robson SC, et al. Promoter-bound  
701 METTL3 maintains myeloid leukaemia by m 6 A-dependent translation control. *Nature*.  
702 2017;552(7683):126.
- 703 63. Li M, Zhao X, Wang W, Shi H, Pan Q, Lu Z, et al. Ythdf2-mediated m 6 A mRNA clearance modulates  
704 neural development in mice. *Genome biology*. 2018;19(1):69.
- 705 64. Wen J, Lv R, Ma H, Shen H, He C, Wang J, et al. Zc3h13 regulates nuclear RNA m 6 A methylation  
706 and mouse embryonic stem cell self-renewal. *Molecular cell*. 2018;69(6):1028–38.
- 707 65. Huang H, Weng H, Zhou K, Wu T, Zhao BS, Sun M, et al. Histone H3 trimethylation at lysine 36  
708 guides m 6 A RNA modification co-transcriptionally. *Nature*. 2019;1.
- 709 66. Zheng G, Dahl JA, Niu Y, Fedorcsak P, Huang C-M, Li CJ, et al. ALKBH5 is a mammalian RNA  
710 demethylase that impacts RNA metabolism and mouse fertility. *Molecular cell*. 2013;49(1):18–29.

- 711 67. Dobin A, Davis CA, Schlesinger F, Drenkow J, Zaleski C, Jha S, et al. STAR: ultrafast universal RNA-  
712 seq aligner. *Bioinformatics*. 2013;29(1):15–21.
- 713 68. Tirumuru N, Zhao BS, Lu W, Lu Z, He C, Wu L. N6-methyladenosine of HIV-1 RNA regulates viral  
714 infection and HIV-1 Gag protein expression. *Elife*. 2016;5:e15528.
- 715 69. Rubio RM, Depledge DP, Bianco C, Thompson L, Mohr I. RNA m6A modification enzymes shape  
716 innate responses to DNA by regulating interferon  $\beta$ . *Genes & development*. 2018;32(23–24):1472–  
717 84.
- 718 70. Winkler R, Gillis E, Lasman L, Safra M, Geula S, Soyris C, et al. m6A modification controls the  
719 innate immune response to infection by targeting type I interferons. *Nature immunology*.  
720 2019;20(2):173.
- 721 71. Jia G, Fu Y, Zhao X, Dai Q, Zheng G, Yang Y, et al. N6-methyladenosine in nuclear RNA is a major  
722 substrate of the obesity-associated FTO. *Nature chemical biology*. 2011;7(12):885.
- 723 72. Wei J, Liu F, Lu Z, Fei Q, Ai Y, He PC, et al. Differential m6A, m6Am, and m1A demethylation  
724 mediated by FTO in the cell nucleus and cytoplasm. *Molecular cell*. 2018;71(6):973–85.
- 725 73. Mauer J, Luo X, Blanjoie A, Jiao X, Grozhik AV, Patil DP, et al. Reversible methylation of m6Am in  
726 the 5' cap controls mRNA stability. *Nature*. 2017;541(7637):371.
- 727 74. Aguilo F, Zhang F, Sancho A, Fidalgo M, Di Cecilia S, Vashisht A, et al. Coordination of m6A mRNA  
728 methylation and gene transcription by ZFP217 regulates pluripotency and reprogramming. *Cell stem*  
729 *cell*. 2015;17(6):689–704.
- 730 75. Chakrabarti AM, Haberman N, Praznik A, Luscombe NM, Ule J. Data science issues in studying  
731 Protein–RNA interactions with CLIP technologies. *Annual Review of Biomedical Data Science*.  
732 2018;1:235–61.
- 733 76. Liu B, Merriman DK, Choi SH, Schumacher MA, Plangger R, Kreutz C, et al. A potentially abundant  
734 junctional RNA motif stabilized by m6A and Mg<sup>2+</sup>. *Nature Communications*. 2018 Jul 17;9(1):2761.
- 735 77. Bolger AM, Lohse M, Usadel B. Trimmomatic: a flexible trimmer for Illumina sequence data.  
736 *Bioinformatics*. 2014;30(15):2114–20.
- 737 78. Bray NL, Pimentel H, Melsted P, Pachter L. Near-optimal probabilistic RNA-seq quantification. *Nature*  
738 *biotechnology*. 2016;34(5):525.

- 739 79. Quinlan AR, Hall IM. BEDTools: a flexible suite of utilities for comparing genomic features.  
740 Bioinformatics. 2010;26(6):841–2.
- 741 80. Gu Z, Eils R, Schlesner M. Complex heatmaps reveal patterns and correlations in multidimensional  
742 genomic data. Bioinformatics. 2016;32(18):2847–9.
- 743 81. Reimand J, Arak T, Adler P, Kolberg L, Reisberg S, Peterson H, et al. g: Profiler—a web server for  
744 functional interpretation of gene lists (2016 update). Nucleic acids research. 2016;44(W1):W83–9.
- 745 82. Gokhale NS, McIntyre ABR, McFadden MJ, Roder AE, Kennedy EM, Gandara JA, et al. N6-  
746 methyladenosine in Flaviviridae viral RNA genomes regulates infection. Cell host & microbe. 2016  
747 Nov;
- 748
