1 **Limits in the detection of m<sup>6</sup>A changes using MeRIP/m<sup>6</sup>A-seq**

2 Alexa B.R. McIntyre<sup>1,2\*</sup>, Nandan S. Gokhale<sup>3</sup>, Leandro Cerchietti<sup>4</sup>, Samie R. Jaffrey<sup>5</sup>, Stacy M. Horner<sup>3,6\*</sup>,

3 Christopher E. Mason<sup>1,7,8,9\*</sup>

4  
5 <sup>1</sup>Department of Physiology and Biophysics, Weill Cornell Medicine, New York City, NY 10065

6 <sup>2</sup>Tri-Institutional Program in Computational Biology and Medicine, New York City, NY 10065

7 <sup>3</sup>Department of Molecular Genetics and Microbiology, Duke University Medical Center, Durham, NC  
8 27710

9 <sup>4</sup>Division of Hematology and Medical Oncology. Weill Cornell Medicine, New York City, NY 10065

10 <sup>5</sup>Department of Pharmacology, Weill Cornell Medicine, New York City, NY 10065

11 <sup>6</sup>Department of Medicine, Duke University Medical Center, Durham, NC 27710

12 <sup>7</sup>The HRH Prince Alwaleed Bin Talal Bin Abdulaziz Alsaud Institute for Computational Biomedicine, Weill  
13 Cornell Medicine, New York, NY 10021

14 <sup>8</sup>The Feil Family Brain and Mind Research Institute, Weill Cornell Medicine, New York, NY 10065

15 <sup>9</sup>The WorldQuant Initiative for Quantitative Prediction, Weill Cornell Medicine, New York, NY 10021

16  
17 \*corresponding authors:

18 Alexa B.R. McIntyre, [abm237@cornell.edu](mailto:abm237@cornell.edu)

19 Stacy M. Horner, [stacy.horner@duke.edu](mailto:stacy.horner@duke.edu)

20 Christopher E. Mason [chm2042@med.cornell.edu](mailto:chm2042@med.cornell.edu)

21  
22  
23  
24  
25  
26  
27

## 28 **Abstract**

29 Many cellular mRNAs contain the modified base m<sup>6</sup>A, and recent studies have suggested that various  
30 stimuli can lead to changes in m<sup>6</sup>A. The most common method to map m<sup>6</sup>A and to predict changes in m<sup>6</sup>A  
31 between conditions is methylated RNA immunoprecipitation sequencing (MeRIP-seq), through which  
32 methylated regions are detected as peaks in transcript coverage from immunoprecipitated RNA relative to  
33 input RNA. Here, we generated replicate controls and reanalyzed published MeRIP-seq data to estimate  
34 reproducibility across experiments. We found that m<sup>6</sup>A peak overlap in mRNAs varies from ~30 to 60%  
35 between studies, even in the same cell type. We then assessed statistical methods to detect changes in  
36 m<sup>6</sup>A peaks as distinct from changes in gene expression. However, from these published data sets, we  
37 detected few changes under most conditions and were unable to detect consistent changes across  
38 studies of similar stimuli. Overall, our work identifies limits to MeRIP-seq reproducibility in the detection  
39 both of peaks and of peak changes and proposes improved approaches for analysis of peak changes.

40

## 41 **Keywords**

42 RNA base modifications, N<sup>6</sup>-methyladenosine, MeRIP-seq, m<sup>6</sup>A-seq, RNA immunoprecipitation  
43 sequencing, statistical methods, bioinformatics

44

## 45 **Introduction**

46 Methylation at the N<sup>6</sup> position in adenosine (m<sup>6</sup>A) is the most common internal modification in  
47 eukaryotic mRNA. A methyltransferase complex composed of METTL3, METTL14, WTAP, VIRMA, and  
48 other cofactors catalyzes methylation at DRACH/DRAC motifs, primarily in the last exon (1,2). Most m<sup>6</sup>A  
49 methylation occurs during transcription (3). The modification then affects mRNA metabolism through  
50 recognition by RNA-binding proteins that regulate processes including translation and mRNA degradation  
51 (4–9). However, whether m<sup>6</sup>A is lost and gained in response to various cellular changes remains  
52 contentious (3,10–15). To assess the evidence for proposed dynamic changes in m<sup>6</sup>A, a reliable and  
53 reproducible method to detect changes in methylation as distinct from changes in gene expression is  
54 necessary.

55           The first and most widely-used method to enable transcriptome-wide studies of m<sup>6</sup>A, MeRIP-seq  
56 or m<sup>6</sup>A-seq, involves the immunoprecipitation of m<sup>6</sup>A-modified RNA fragments followed by peak detection  
57 through comparison to background gene coverage (16,17). A second method was developed in 2015,  
58 miCLIP or m<sup>6</sup>A-CLIP, which involves crosslinking at the site of antibody binding to induce mutations  
59 during reverse transcription for single-nucleotide detection of methylated bases (2,18). MeRIP-seq is still  
60 more often used than miCLIP, despite less precise localization of m<sup>6</sup>A to peak regions of approximately  
61 50-200 base pairs that can contain multiple DRAC motifs, since it follows a simpler protocol, requires less  
62 starting material, and generally produces higher coverage of more transcripts. Antibodies for m<sup>6</sup>A can  
63 also detect a second base modification, N<sup>6</sup>,2'-O-dimethyladenosine (m<sup>6</sup>A<sub>m</sub>), found at a lower abundance  
64 than m<sup>6</sup>A and located at the 5' ends of select transcripts (15,18). We thus refer to the base modifications  
65 detected through MeRIP-seq collectively as m<sup>6</sup>A<sub>(m)</sub>, although most are likely m<sup>6</sup>A. As of late 2018, over  
66 fifty studies used MeRIP-seq to detect m<sup>6</sup>A<sub>(m)</sub> in mammalian mRNA (**Additional File 1: Supplementary**  
67 **Table 1**).

68           Although MeRIP-seq can reveal approximate sites of m<sup>6</sup>A<sub>(m)</sub>, it cannot be used to quantitatively  
69 measure the fraction of transcript copies that are methylated (19). Studies of m<sup>6</sup>A variation in response to  
70 stimuli instead estimate differences at individual loci through changes in peak presence or peak height.  
71 Using these approaches, studies have reported changes to m<sup>6</sup>A with heat shock, microRNA expression,  
72 transcription factor expression, cancer, oxidative stress, human immunodeficiency virus (HIV) infection,  
73 Kaposi's sarcoma herpesvirus (KSHV) infection, and Zika virus infection, including hundreds to thousands  
74 of changes in enrichment at specific sites (20–29). Statistical approaches to analysis have only recently  
75 been published and there have been no comprehensive evaluations of methods to detect changes in m<sup>6</sup>A  
76 based on MeRIP-seq data (30,31). Thus, while studies have suggested that m<sup>6</sup>A shows widespread  
77 changes in response to diverse stimuli, they have applied inconsistent analysis methods to detect  
78 changes in m<sup>6</sup>A and often don't control for differences in RNA expression between conditions or typical  
79 variability in peak heights between replicates. In some cases, these studies have reported m<sup>6</sup>A changes  
80 based on simple differences in peak count (24,26,27,32). However, others have applied statistical tests or  
81 thresholds for differences in immunoprecipitated (IP) over input fraction enrichment and visual analysis of

82 coverage plots, and have reported fewer m<sup>6</sup>A changes or suggested that m<sup>6</sup>A is a relatively stable mark  
83 (33,34). As in RNA-seq, there is noise in MeRIP-seq, and multiple replicates are therefore necessary to  
84 estimate variance and statistically identify the effects of experimental intervention (35–37). To date, only  
85 one MeRIP-seq study has used more than three replicates per condition (34), while ten have used only  
86 one (17,20,32,33,38–43), suggesting that most studies may not have enough power to detect changes in  
87 m<sup>6</sup>A<sub>(m)</sub>.

88 To re-evaluate the evidence for m<sup>6</sup>A<sub>(m)</sub> changes under various conditions, we first examined the  
89 variability in m<sup>6</sup>A<sub>(m)</sub> detection across replicates, cell lines, and experiments using our own negative  
90 controls (12 replicates) as well as 24 published MeRIP-seq data sets. We then compared statistical  
91 methods to detect differences in IP enrichment using biological negative and positive controls for m<sup>6</sup>A  
92 changes. We found that these methods are limited by noise, including biological variability from changes  
93 in RNA expression and technical variability from immunoprecipitation and sequencing that limits  
94 reproducibility across studies. Our results suggest that the scale of statistically detectable m<sup>6</sup>A<sub>(m)</sub> changes  
95 in response to various stimuli is orders of magnitude lower than the scale of changes reported in many  
96 studies. However, we also found that statistical detection could miss the majority of changed sites when  
97 using only 2-3 replicates. We use our results to propose approaches to MeRIP-seq experimental design  
98 and analysis to improve reproducibility and more accurately measure differential regulation of m<sup>6</sup>A<sub>(m)</sub> in  
99 response to stimuli. These data and analyses emphasize the need for further research and alternative  
100 assays, for example recently developed endoribonuclease-based sequencing methods (44,45) or direct  
101 RNA nanopore sequencing (46), to resolve the extent to which m<sup>6</sup>A changes in response to specific  
102 conditions.

103

## 104 **Results**

### 105 *Detection of peaks across replicates, experiments, and cell types*

106 The first steps in MeRIP-seq data analysis are to align sequencing reads to the genome or  
107 transcriptome of origin and to identify peaks in transcript coverage in the IP fraction relative to the input  
108 control. Several methods have been developed for MeRIP-seq peak detection, including exomePeak,

109 MeTPeak, MeTDiff, and bespoke scripts. Another method often used for MeRIP-seq peak detection is  
110 MACS2, which was originally designed to detect protein binding sites in DNA from chromatin  
111 immunoprecipitation sequencing (ChIP-seq). We compared m<sup>6</sup>A<sub>(m)</sub> peak detection by exomePeak,  
112 MeTPeak, MeTDiff, and MACS2 (31,47–49) in seven replicates of MeRIP-seq data obtained from mouse  
113 cortices under basal conditions (34), and in 12 replicates of MeRIP-seq data we generated from human  
114 liver Huh7 cells (50). The intersect between all tools tested was high, and we saw minimal differences in  
115 DRAC motif enrichment, which we use to provide an estimate of tool precision in the absence of true  
116 positive m<sup>6</sup>A sites (**Additional File 2: Supplementary Figure 1a**). In addition, we assessed the  
117 METTL3/METTL14-dependence of specific peaks identified by single tools using MeRIP-RT-qPCR. We  
118 found that of these peaks, 4/4 from MACS2, 5/5 from MeTPeak, and 4/5 from MeTDiff showed decreased  
119 m<sup>6</sup>A<sub>(m)</sub> enrichment following METTL3/METTL14 depletion, suggesting that these are true m<sup>6</sup>A sites. By  
120 comparison, only 1/5 of the peaks uniquely called by exomePeak showed statistically significant  
121 decreases ( $p < 0.05$ ), although replicate variance was high and 4/5 showed a downward trend  
122 (**Additional File 2: Supplementary Figure 1b**). Since MACS2 was the most commonly used tool for  
123 peak calling and was previously found to perform well in comparison with a graphical user interface tool  
124 and several other peak callers (51), we used MACS2 for the remainder of our analyses. Repeating the  
125 analyses shown in Figures 2-4 using the MeTDiff peak caller instead of MACS2 did not affect any of our  
126 conclusions (**Additional File 3**).

127 For m<sup>6</sup>A<sub>(m)</sub> peak detection, a transcript must be sufficiently expressed for enrichment by the  
128 m<sup>6</sup>A<sub>(m)</sub> antibody and for adequate sequencing coverage in both the IP and input fractions. Previous  
129 reports have suggested that m<sup>6</sup>A<sub>(m)</sub> presence does not decrease with lower mRNA expression level, and,  
130 if anything, is higher in mRNAs with lower expression as methylated transcripts tend to be less stable  
131 (9,38). Peak callers, however, identify fewer peaks in genes at low expression, which we therefore  
132 assume reflects inadequate coverage for peak calling. To estimate the level of coverage necessary for  
133 peak detection, we analyzed the percent of genes with at least one, two, or three peaks relative to mean  
134 input transcript coverage in both the mouse cortex and Huh7 cell data (**Figure 1a**). Based on the upper  
135 shoulders of the sigmoidal curves as the percent of genes with peaks begins to plateau, we estimate that

136 mean gene coverage of approximately 10-50X is necessary to avoid missing peaks based on insufficient  
 137 coverage. Including a wider array of samples in this analysis likewise showed an increase in the percent  
 138 of transcripts with  $\geq 1$  peak as coverage rose to 10X (**Additional File 2: Supplementary Figure 1c**). Our  
 139 analysis of the input RNA-seq coverage of peak regions alone again supported a similar threshold; few  
 140 peaks are detected with median input read counts below 10 across replicates (**Additional File 2:**  
 141 **Supplementary Figure 1d**). These thresholds do not mean that peaks in genes with mean coverage  $<$   
 142 10X or peaks with fewer than 10 input reads are false positives, but that the likelihood of false negatives  
 143 rises with lower coverage (**Additional File 2: Supplementary Figure 1e**).

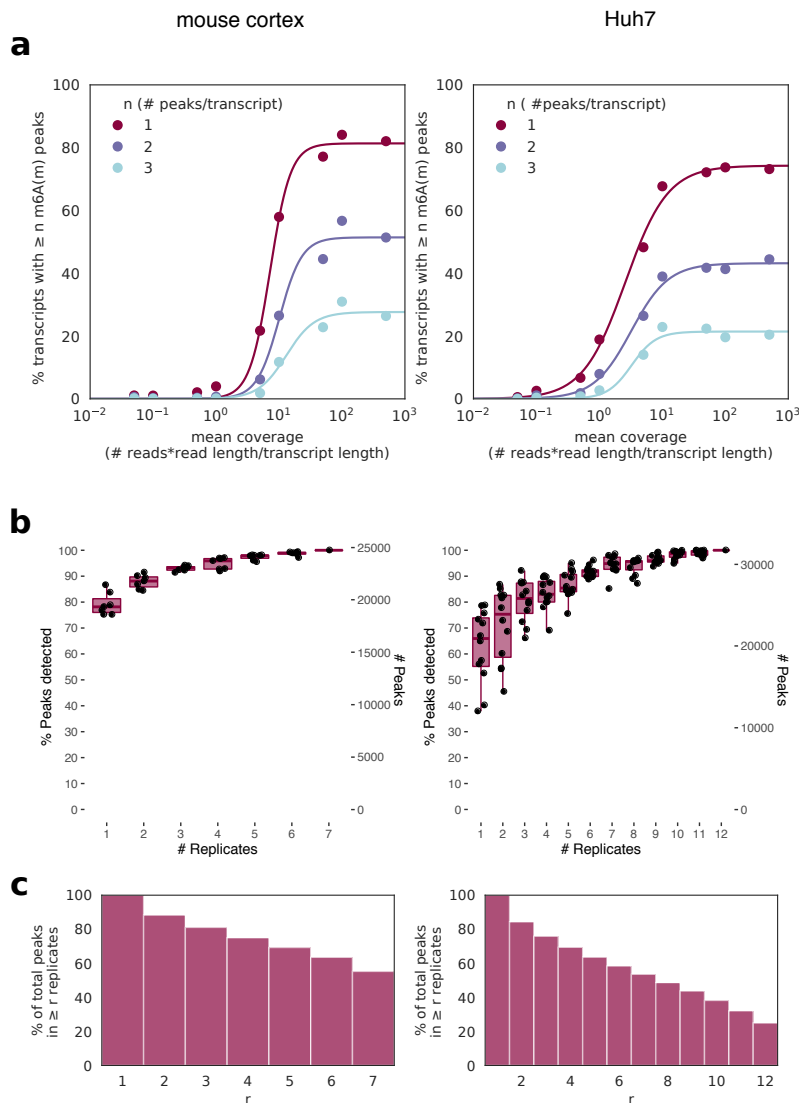

**Figure 1: Thresholds for peak detection.** **a)**  $m^6A_{(m)}$  site detection in MeRIP-seq data from mouse cortex (left) and human liver cells (Huh7, right) shows saturation of peak detection as transcript coverage approaches 10-50X for replicates at basal conditions, with peaks merged from all replicates. **b)** The total number of peaks captured increases with more replicates, with single replicates capturing a median of 66-78% of total peaks depending on study. Boxes span the 1<sup>st</sup> to 3<sup>rd</sup> quartiles of distributions for random subsamples of replicates, with lines indicating the median number of peaks, and whiskers showing the minimum and maximum points within  $\pm 1.5x$  the interquartile distance from the boxes. Jittered points show results for each random subsample (a total of 6 subsamples per replicate number for the mouse cortex data and 12 for the Huh7 data). **c)** The percent of peaks detected in at least  $r$  replicates for the same data sets.

145 To evaluate the reproducibility of MeRIP-seq data, we next examined the consistency of m<sup>6</sup>A<sub>(m)</sub>  
146 peak calling between replicates. Previous studies have reported that peak overlap between replicates is  
147 approximately 80% (9,16,52,53). Similarly, we found that between two replicates, log<sub>2</sub> fold enrichment of  
148 IP over input reads at detected peaks showed a Pearson correlation of approximately 0.81 to 0.86  
149 **(Additional File 2: Supplementary Figure 1f)**. A single sample captured a median of 78% of the peaks  
150 found in seven replicates of mouse cortex data and 66% of peaks found in twelve replicates of Huh7 cell  
151 data. The number of detected peaks increased log-linearly with the addition of more replicates, such that  
152 with three replicates, 84-92% of the peaks found with 7-12 replicates were detected **(Figure 1b)**.  
153 Conversely, the number of peaks in common across replicates decreased as the number of replicates  
154 increased, such that while ~80% of peaks were detected in at least two replicates, only ~60% were  
155 detected in six replicates for both data sets and ~25% in all twelve replicates of Huh7 cell data **(Figure**  
156 **1c)**. Detection of peaks in more replicates did not increase DRAC motif enrichment **(Additional File 2:**  
157 **Supplementary Figure 1g)**. These results suggest that many m<sup>6</sup>A<sub>(m)</sub> sites may be missed in studies that  
158 use one to three replicates, and that increasing replicates could enable detection of more peaks.  
159 However, not all peaks correspond to true m<sup>6</sup>A<sub>(m)</sub> sites. A recent comparison to data from an  
160 endoribonuclease-based method for m<sup>6</sup>A detection suggested MeRIP-seq has a false positive rate of  
161 ~11%, although this would differ by study and detection threshold (3,54).

162 The number of peaks detected across studies varies. Given that coverage affects peak detection,  
163 we hypothesized that variation in sequencing depth could contribute to differences in peak count. Zeng et  
164 al. (2018) reported that peak count begins to saturate by around 20 million reads by subsampling data  
165 within individual studies (42). However, we found that there is no positive correlation between peak count  
166 and input or IP sequencing depth across data sets from different published studies, each of which had 3-  
167 81M reads per replicate (input Pearson's R = -0.37, p = 0.015; IP Pearson's R = -0.17, p = 0.28)  
168 **(Additional File 1: Supplementary Table 2, Additional File 2: Supplementary Figure 2a-b)**. This  
169 implies that experimental factors beyond sequencing depth contribute to the variability of peak counts  
170 across studies.

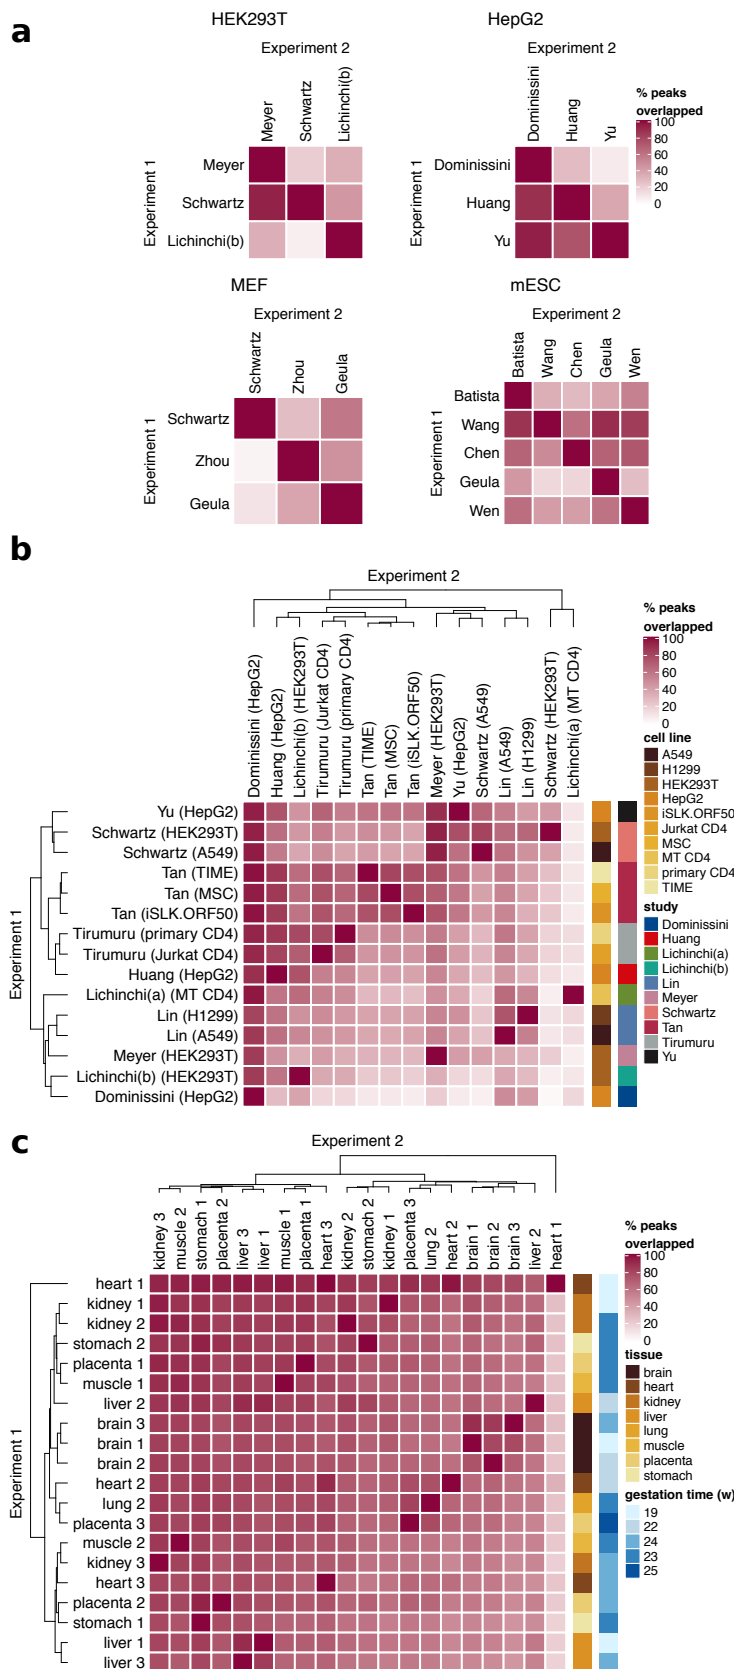

**Figure 2: Reproducibility of peak detection.** a) Peak detection between studies that used the same cell type shows variable overlap. Overlap was calculated as the percent of peaks detected in Experiment 1 with an overlap of  $\geq 1$  base pair with peaks from Experiment 2. b) Peak detection across tissue and cell types shows samples from the same study cluster better together than samples from the same tissue. Median overlap was 46%. c) Peak detection across tissue types for data from the same study (Xiao et al., 2019). Median overlap was 72%. Studies used in (a) and (b) are described in **Additional File 1: Supplementary Table 2**.



172 We next analyzed the overlap of peaks among studies and found inconsistency in peak  
173 localization on transcripts as well. Within four commonly used cell types, the percent of peaks detected in  
174 one experiment that were also detected in a second varied among pairs of studies from as low as 2% of  
175 peaks to as high as 90% (median = 45%), after filtering for transcripts expressed above a mean of 10X  
176 input coverage in both to ensure sufficient expression for peak detection (**Figure 2a**). In fact, peaks  
177 showed higher overlap within different cell types from the same study than within the same cell type from  
178 different studies, suggesting that MeRIP-seq data is prone to strong batch effects (**Figure 2b**). While this  
179 could be due to differences among experimental protocols used (summarized in **Additional File 1:**  
180 **Supplementary Table 2**), we were unable to identify such a link. Overall, most percent overlaps of  $m^6A_{(m)}$   
181 peaks fell between ~30% (1<sup>st</sup> quartile) and ~60% (3<sup>rd</sup> quartile) (**Figure 2b**). With rare exceptions (e.g. that  
182 described by Ke et al., 2017 in their Supplementary Figure 8 (3)), most MeRIP-seq data sets do show  
183 enrichment of the  $m^6A$  motif DRAC. These results indicate, however, that multiple labs running MeRIP-  
184 seq on the same cell type will detect different subsets of  $m^6A_{(m)}$  sites. Possible contributing factors in the  
185 differences among studies include cell state (e.g. different stages of the cell cycle), experimental  
186 conditions, and sequencing depth. Despite predictions that tissue or cell type would be a large factor in  
187 differences among samples, though, peaks detected in different tissues analyzed in a single experiment  
188 showed high overlap and little clustering by tissue type (**Figure 2c**) (55). This suggests that although  
189 there is evidence that  $m^6A$  levels vary by tissue (19), modified sites are consistent.

190

#### 191 *Detection of changes in peaks between conditions*

192 Following  $m^6A_{(m)}$  peak detection, many studies compare the expression of peaks between two  
193 conditions to predict peak changes. While looking at plots of IP and input gene coverage under different  
194 conditions can help evaluate the evidence for these changes (33), statistical or heuristic methods are first  
195 necessary to narrow down a list of candidate sites to plot. Several tools used for statistical analysis by  
196 the studies in **Additional File 1: Supplementary Table 1** or for other types of RNA IP sequencing assays  
197 model peak counts using either (a) the Poisson distribution, in which the variance of a measure (here,  
198 read counts) is assumed to be equal to the mean (MeTDiff), or (b) the negative binomial distribution, in

199 which a second parameter allows for independent adjustment of mean and variance (QNB and two  
200 implementations of a generalized linear model approach using DESeq2 or edgeR, **Table 1**) (30,31,56–  
201 58). In the mouse cortex and Huh7 cell data, we found that, similar to RNA-seq data (24,57,59), the  
202 variance in read counts under peaks exceeded their mean, indicative of overdispersion (**Additional File**  
203 **2: Supplementary Figure 3a**). The log likelihood (the probability of an observation given a distribution  
204 with known parameters) for our sample also fell within the distribution of expected log likelihoods for the  
205 negative binomial distribution (bottom) but not the Poisson distribution (top) (**Figure 3a**). Thus, the  
206 negative binomial distribution captures the mean-variance relationship in MeRIP-seq data, suggesting  
207 that tools that account for overdispersion better model the distribution of read counts at m<sup>6</sup>A<sub>(m)</sub> peaks than  
208 tools that do not.

209

210 **Table 1:** Statistical methods for the detection of peak changes

| Method                       | Read count distribution | Publication                 |
|------------------------------|-------------------------|-----------------------------|
| MeTDiff                      | Poisson                 | Cui et al. (2018)           |
| Quad-negative binomial (QNB) | Negative binomial       | Liu et al. (2017)           |
| GLM (DESeq2)                 | Negative binomial       | based on Park et al. (2014) |
| GLM (edgeR)                  | Negative binomial       | method for HITS-CLIP        |

211

212 We next defined positive and negative controls to evaluate tool performance for detection of  
213 changes in m<sup>6</sup>A<sub>(m)</sub> peaks. Past publications describing new methods to detect m<sup>6</sup>A<sub>(m)</sub> peak changes have  
214 used data sets in which methylation machinery genes or the methyl donor were disrupted compared to  
215 baseline conditions as positive controls, and have simulated negative controls by randomly swapping  
216 labels in the positive controls (30,31). However, swapping labels for conditions that may feature  
217 differences in gene expression in addition to differences in m<sup>6</sup>A levels could unrealistically increase  
218 variance in read counts within groups. Therefore, we instead used the two data sets from mouse cortex  
219 and Huh7 cells, which each comprised many replicates at baseline conditions (n=7 and n=12,

220 respectively), as negative controls. We randomly divided the mouse cortex data into two groups of three  
 221 to four replicates for comparison and divided the Huh7 replicates by lab of incubation, which did not affect  
 222 sample clustering (**Additional File 2: Supplementary Figure 3b**). We would expect to see minimal  
 223 changes in IP enrichment at m<sup>6</sup>A peaks between groups for our negative controls, whereas our positive  
 224 controls, which featured genetic or chemical interference with the m<sup>6</sup>A machinery, should show  
 225 discernible differences in peaks when compared to baseline or wildtype conditions in the same cell lines  
 226 (summarized in **Additional File 1: Supplementary Table 3**). Indeed, the absolute difference in log<sub>2</sub> fold  
 227 change between peaks and genes was centered around 0 for the negative controls and showed small  
 228 shifts that varied in magnitude and direction for the positive controls (**Additional File 2: Supplementary**  
 229 **Figure 3c**).

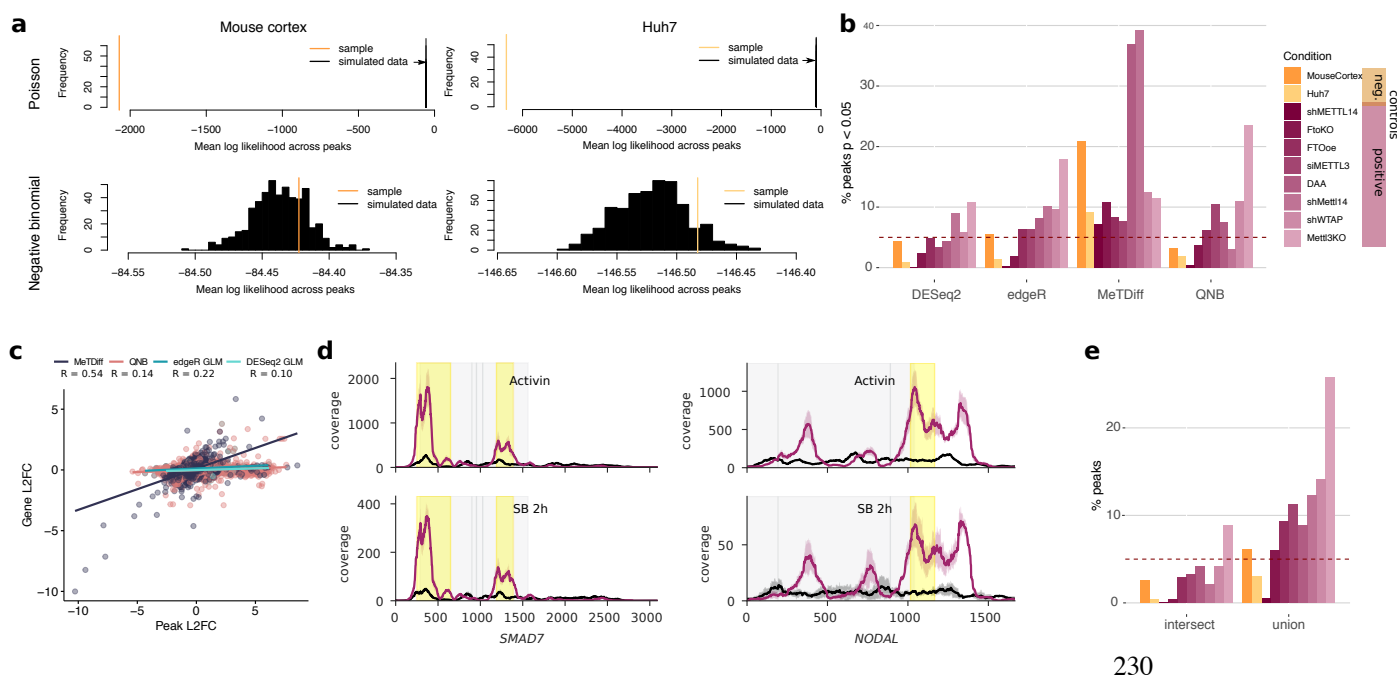

230

**Figure 3: Analysis of methods to detect peak changes disproportional to gene expression changes.** **a)** A comparison of Poisson (above) and negative binomial (below) models for read counts under peaks. The negative binomial mean log likelihood of the sample data fell within the 74<sup>th</sup> and 89<sup>st</sup> percentiles of 500 simulations for mouse cortex and Huh7 cell data, respectively, while the Poisson model failed to capture the sample distributions. **b)** The percent of sites below an unadjusted p-value threshold of 0.05 for different methods (described in **Table 1**) to detect differential methylation in negative controls between two groups at baseline conditions and positive controls in which methylation processes were disrupted with respect to baseline conditions (**Additional File 1: Supplementary Table 3**). The line at 5% indicates the expected proportion of sites given a uniform p-value distribution (see **Additional File 2: Supplementary Figure 2c**), while colours indicate negative (orange) and positive (purple) control experiments. **c)** The correlation between change in gene expression and change in peak expression between conditions for sites identified as differentially methylated in the eight positive control experiments. Pearson's R = 0.22, 0.10, 0.55, and 0.14 for edgeR, DESeq2, MeTDiff, and QNB, respectively, with p = 0.05, 0.09, 5.8E-87, and 2.4E-11. **d)** Coverage plots showing changes in peak expression are proportional to changes in gene expression for genes identified as differentially methylated by Bertero et al. (2018) using MeTDiff with activin signaling and an activin-NODAL inhibitor, SB431542 (SB). Lines show the mean coverage across three replicates, while shading shows the standard deviation. Peaks detected as significantly changed are highlighted in yellow. Coding sequences are shown in grey. **e)** The intersect and union of peaks with p < 0.05 from DESeq2, edgeR, and QNB from (b), coloured as in (b).

231

232           Using statistical methods to detect changes in peak enrichment, we found that the percent of  
233 changes called below a p-value threshold of 0.05 were similar in the positive and negative controls  
234 (**Figure 3b**). With all tools except MeTDiff, a knockout of *Mettl3* showed the largest effects on m<sup>6</sup>A (60),  
235 while fewer significant peaks in other positive controls suggested variable effects of the positive control  
236 conditions on m<sup>6</sup>A<sub>(m)</sub>, possibly related to efficiency of the methylation machinery knockdown or  
237 overexpression (7,33,61–65). In the absence of true differences between groups, p-value distributions  
238 should be uniform for well-calibrated statistical tests, meaning that ~5% of peaks should have p-values <  
239 0.05 for the negative controls. MeTDiff reported an excess number of sites with p-values below 0.05  
240 (**Additional File 2: Supplementary Figure 3d**) and identified a higher percentage of sites as differentially  
241 methylated in the mouse cortex negative control data set than in all but two positive controls (**Figure 3b**).  
242 On the other hand, the generalized linear models (GLMs) and QNB showed uniform to conservatively  
243 shifted p-value distributions, with differences between the mouse cortex and Huh7 data sets (**Additional**  
244 **File 2: Supplementary Figure 3d**), suggesting that these tools detect fewer false positives.

245           To ensure significant peak changes detected by each of the tools reflected changes in IP  
246 enrichment independent of differential gene expression, we measured the correlation between changes in

247 IP read counts at peak sites and changes in input read counts across their encompassing genes. For  
248 significant peaks (FDR-adjusted p-value < 0.05) from the positive controls, correlation between  $\log_2$  fold  
249 change in peak IP and gene input read counts was low for the GLMs and QNB (Pearson's R = 0.10 to  
250 0.22) but reached 0.55 ( $p = 5.8E-87$ ) for MeTDiff (**Figure 3c**). The higher correlation for MeTDiff was  
251 driven by peaks with proportional changes in IP and input levels, which suggests that MeTDiff often  
252 detects differential expression of methylated genes rather than differential methylation. Therefore,  
253 published studies that have used MeTDiff may actually be detecting differential expression and not  
254 differential methylation (22,66). Indeed, plotting coverage for genes reported as differentially methylated  
255 in one of these studies, with the y-axis scaled separately per condition, confirmed that changes in m<sup>6</sup>A  
256 identified by MeTDiff were proportional to changes in gene expression (**Figure 3d**) (22). Given these  
257 results, QNB or the GLM implementations are better methods than MeTDiff to detect differential  
258 methylation. Taking the intersect of significant peaks for the GLMs and QNB may help determine the  
259 most probable sites of m<sup>6</sup>A changes, while taking the union of predictions provides a less conservative  
260 approach to selecting sites for further validation (**Figure 3e**). However, additional filters are needed for  
261 robust peak change detection as there were still significant peaks for which the difference between peak  
262  $\log_2$  fold change and gene  $\log_2$  fold change was close to zero, particularly with QNB (**Additional File 2:**  
263 **Supplementary Figure 3e**). For microarray and RNA-seq data, a filter of absolute  $\log_2$  fold change > 1  
264 has been recommended to reduce false positive rates (67); in the remainder of our analyses, we  
265 implemented a similar filter for absolute difference in peak and gene  $\log_2$  fold change  $\geq 1$  to the combined  
266 predictions from QNB and the two GLMs, with an additional filter where noted for peak read counts  $\geq 10$   
267 across all replicates and conditions to ensure sufficient coverage for consistent peak detection (as  
268 discussed in Figure 1a).

269

#### 270 *Reanalyzing peak changes between conditions*

271 We next estimated the scale of statistically detectable peak changes under various conditions  
272 using our approaches and compared these results to previously reported estimates of these changes  
273 (**Figure 4a, Additional File 1: Supplementary Table 4**). We identified fewer peaks as differentially

274 methylated than originally reported under most conditions, with zero to hundreds of peaks significantly  
275 changed (depending on experiment and method), versus hundreds to over ten thousand described in  
276 publications (22–26,34,63,66,68–71). Notably, knockdown of Zc3h13 did appear to disrupt m<sup>6</sup>A<sub>(m)</sub>,  
277 suggesting the gene does participate in methylation as recently described (69). Another study reported  
278 that activin treatment of human pluripotent stem cells led to differential methylation of genes that encode  
279 pluripotency factors (22). However, our reanalysis only found a few peak changes that passed our filters  
280 for significance, fold change, and expression (minimum input read count across peaks ≥ 10), and no  
281 enrichment for pluripotency factors among affected genes. Even when we removed the thresholds for fold  
282 change and expression, the adjusted p-value for “signaling pathways regulating pluripotency of stem  
283 cells” was still 0.15 and driven by only three genes, LEFTY2, FZD28, and FGFR3 (**Additional File 2:**  
284 **Supplementary Figure 4a**). Interestingly, the minimum read threshold made a particularly dramatic  
285 difference in the case of a recent study that looked at the effects of knocking down the histone  
286 methyltransferase SETD2 on m<sup>6</sup>A in mRNA. For this data, of the 2065 sites predicted by QNB, 2064 fell  
287 below the minimum read threshold due to low input coverage in the first and second replicates (**Figure**  
288 **4a, Additional File 2: Supplementary Figure 4b-e**) (70). We could not compare our approach to results  
289 reported by Su et al. (2018), who found 6,024 peaks changed with R2HG treatment, Zeng et al. (2018),  
290 who found 465-599 peaks changed between tumour samples, or Ma et al. (2018), who found 12,452  
291 peaks were gained and 11,192 lost between P7 and P20 mouse cerebella, as each relied on a single

292 sample per condition, with no replicates (40–42).

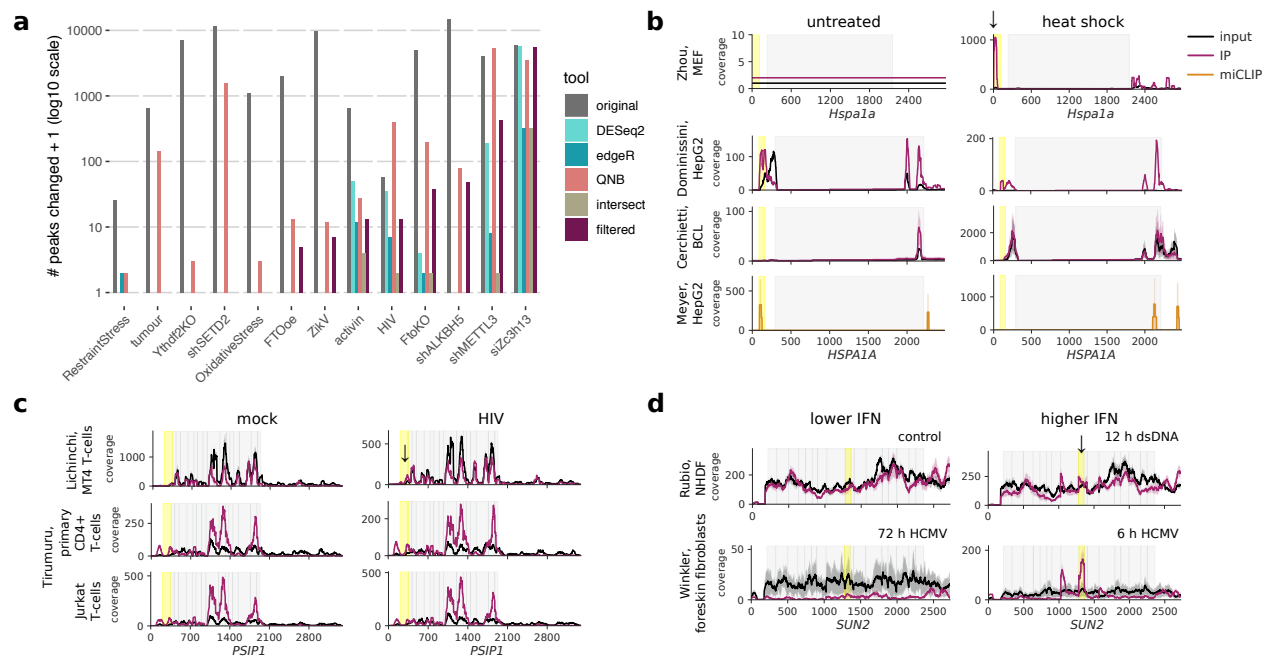

293

**Figure 4: Changes in peaks between conditions.** **a)** Detected m<sup>6</sup>A<sub>(m)</sub> changes in thirteen published data sets that measured m<sup>6</sup>A<sub>(m)</sub> peak changes between two conditions (**Additional File 1: Supplementary Table 4**). The number of peaks detected as changed in the original published analyses are compared to the number of peaks with FDR-adjusted p-values < 0.05 in our reanalysis using DESeq2, edgeR, or QNB, and taking the union of results from these three tools with additional filters for log<sub>2</sub> fold difference in peak and gene changes of ≥1 and peak read counts ≥10 across all replicates and conditions (“filtered”). **b)** Gene coverage plots for *Hspa1a* in mouse embryonic fibroblasts (MEFs) and *HSPA1A* in human cells (HepG2 and BCL) before and after heat shock. Input coverage is shown in black and IP coverage in raspberry, with putative m<sup>6</sup>A peaks changed highlighted in yellow and marked by arrows. miCLIP coverage for an experiment in HepG2 cells is shown in orange. **c)** Coverage plots for *PSIP1*, which was reported to have a change in 5′ UTR m<sup>6</sup>A with HIV infection by Lichinchi et al (2016). **d)** Coverage plots for *SUN2*, in which we detected changes in m<sup>6</sup>A with HCMV infection and dsDNA treatment suggesting a possible increase in methylation under higher interferon conditions (after 12 h of dsDNA treatment compared to untreated controls and after 6 h post-HCMV infection compared to 72 h, when interferon levels have declined). Lines in coverage plots (**b-d**) show the mean across all replicates for each experiment, while shading shows the standard deviation. Coding sequences are shown in grey.

294

295 Multiple studies have investigated m<sup>6</sup>A<sub>(m)</sub> in the context of heat shock, HIV KSHV  
 296 infection, and dsDNA treatment or human cytomegalovirus (HCMV) infection (**Additional File 1:**  
 297 **Supplementary Table 5**). Since each step in MeRIP-seq analysis risks introducing false negatives, we  
 298 cannot rule out consistent changes between studies that used similar experimental interventions based  
 299 on statistical detection alone. Therefore, we started by plotting coverage for specific genes reported as

300 differentially methylated to evaluate reproducibility across these studies. Zhou, et al. (2015) reported 5'  
301 UTR methylation of *Hspa1a* with heat shock (20). Coverage was too low for untreated controls to  
302 determine if *Hspa1a* was simply newly expressed or was actually newly methylated with heat shock  
303 based on our alignment of their data using STAR (72). We were also unable to detect a change in  
304 methylation of *HSPA1A* using data from other heat shock studies, including a new data set from a B-cell  
305 lymphoma cell line and a published miCLIP data set, although coverage was again low (**Figure 4b**)  
306 (4,73). Lichinchi, et al. (2016) reported that 56 genes showed increased methylation with HIV infection in  
307 MT4 T-cells, with enrichment for genes involved in viral gene expression (25). Specific genes, for  
308 example *PSIP1*, in which we also detected a peak using MACS2 and see a change in the peak when  
309 plotting coverage using the data from Lichinchi et al. (2016), did not show the same changes in data from  
310 two other CD4<sup>+</sup> cell types, primary CD4<sup>+</sup> cells and Jurkat cells (**Figure 4c**) (74). Two other studies both  
311 used MeRIP-seq to establish the presence of m<sup>6</sup>A in *IFNB1* induced through dsDNA treatment or by  
312 infection with the dsDNA virus HCMV (75,76). While these studies did not discuss changes in m<sup>6</sup>A, we  
313 used these data sets to examine the replicability of m<sup>6</sup>A<sub>(m)</sub> changes in response to dsDNA sensing and  
314 interferon induction. Although different dsDNA stimuli, time points, and use of a fibroblast cell line versus  
315 primary foreskin fibroblasts make it difficult to compare between the two experiments, using QNB and the  
316 GLM approaches, we found four peaks in three genes (*AKAP8*, *SUN2*, and *TMEM140*) that showed  
317 significant changes with higher interferon (**Figure 4d**). Overall, we were unable to detect the same  
318 changes in m<sup>6</sup>A<sub>(m)</sub> across studies of heat shock or HIV, and we detected only a few common changes in  
319 the response to dsDNA. However, we do note that cell line-specific differences in m<sup>6</sup>A<sub>(m)</sub> regulation and  
320 differences in experimental protocols could account for some of the variability among these studies.

321 We did not have MeRIP-seq data for two studies from exactly the same conditions and cell lines  
322 to compare, but two studies both used cell lines derived from iSLK to study the effects of KSHV on host  
323 m<sup>6</sup>A (27,28). Both suggested that KSHV infection could decrease the number of m<sup>6</sup>A sites in host  
324 transcripts. Hesser et al. (2018) found that lytic KSHV infection decreased the number of peaks on host  
325 transcripts by >25%; Tan et al. (2018) suggested a loss of 17-59% of peaks in two different cell types, but  
326 that m<sup>6</sup>A<sub>(m)</sub> peak fold enrichment showed better clustering by cell type than by infection status. Neither of



327 these studies discussed specific genes that showed differential methylation with lytic infection. For our  
328 comparison of m<sup>6</sup>A<sub>(m)</sub> peak changes in these data sets, we identified probable changes in peaks based on  
329 statistical significance using QNB or the GLMs with log<sub>2</sub> fold change difference between peaks and genes  
330 of ≥1. We detected 80 peak changes in the data from Hesser et al. (2018) and 18 in the data from Tan et  
331 al. (2018) but found no peaks that changed in both iSLK data sets with lytic KSHV infection. Applying the  
332 same statistical approaches, we were likewise unable to detect any shared peak changes between the  
333 studies of HIV infection, and there were insufficient replicates to compare heat shock studies  
334 (16,20,25,73,74). Thus, in our reanalysis of m<sup>6</sup>A changes in response to stimuli, we detected only four  
335 statistically reproducible peak changes, all in response to dsDNA.

336 Disparities between experiments were not simply due to significance thresholding or differences  
337 in peak detection. Taking the union of peaks called in two experiments for KSHV, HIV, and dsDNA  
338 treatment, we found minimal to negative correlations in changes in m<sup>6</sup>A enrichment induced by treatment  
339 at the same sites, further showing that changes with similar treatments are not reproducible (**Additional**  
340 **File 2: Supplementary Figure 4e**).

341

#### 342 *MeRIP-RT-qPCR validation*

343 Although statistical approaches revealed fewer changes in m<sup>6</sup>A<sub>(m)</sub> with various stimuli than  
344 published estimates, and we were unable to confirm changes in m<sup>6</sup>A<sub>(m)</sub> methylation of specific genes  
345 across studies of similar conditions, many of the studies we looked at do include additional validation of  
346 m<sup>6</sup>A<sub>(m)</sub> changes from MeRIP-seq using MeRIP-RT-qPCR. Recently it was shown that MeRIP-RT-qPCR  
347 can capture differences in m<sup>6</sup>A:A ratios at specific sites (34), but it is unknown how MeRIP-RT-qPCR is  
348 affected by changes in gene expression. To test this, we ran MeRIP-RT-qPCR on in vitro transcribed  
349 RNA oligonucleotides that lacked or contained m<sup>6</sup>A spiked into total RNA extracted from Huh7 cells  
350 (**Additional File 1: Supplementary Table 6**). We found that MeRIP-RT-qPCR detected the direction of  
351 change in m<sup>6</sup>A levels at different concentrations of spike-in RNAs (**Figure 5a-b**). However, technical  
352 variation could also lead to spuriously significant differences. For example, a comparison of m<sup>6</sup>A

353 enrichment between two dilutions (0.1 fmol and 10 fmol) of a 30% methylated spike-in mixture returned a  
 354 p-value of 0.004 (unpaired Student's *t*-test).

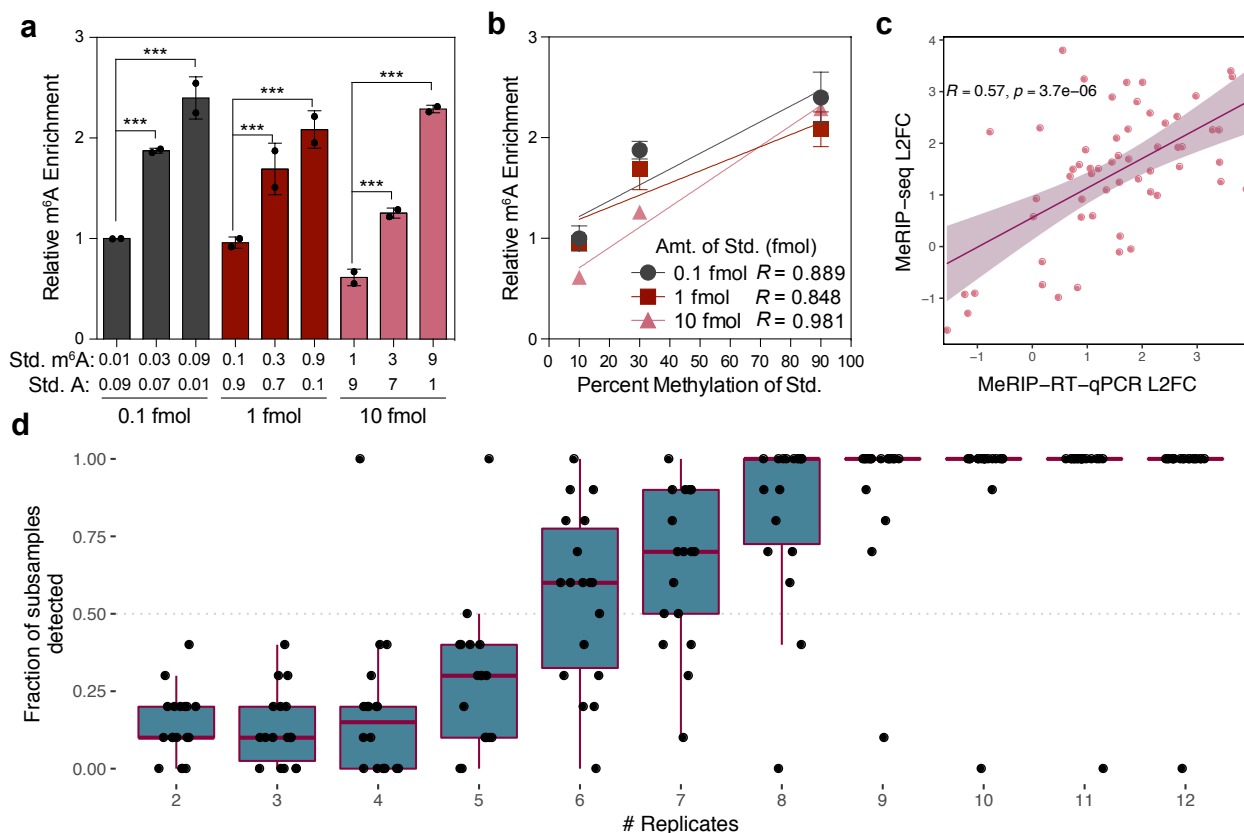

355

**Figure 5: MeRIP-RT-qPCR validation and replicates necessary for the detection of peak changes.**

**a)** Relative enrichment of the indicated amounts of an in vitro transcribed standard containing unmodified A or m<sup>6</sup>A, as measured by MeRIP-RT-qPCR. Data are shown for two independent replicates of three technical replicates each as IP enrichment over input relative to pulldown of a positive control spike-in, with the 0.1 fmol (0.01 m<sup>6</sup>A: 0.09 A) sample normalized to 1. Bars represent mean ± SEM of two independent replicates. \*\*\* p ≤ 0.005 by unpaired Student's *t*-test. **b)** Linear regression of relative m<sup>6</sup>A enrichment from (a). Points and error bars mark mean ± SEM of two independent replicates. **c)** Change in MeRIP-RT-qPCR vs. MeRIP-seq enrichment for peaks detected as significantly differentially expressed with infection of Huh7 cells by dengue virus, Zika virus, and hepatitis C virus. **d)** Number of replicates of infected vs. uninfected cells needed to detect the peaks in (c). Replicates were randomly subsampled 10 times to calculate the fraction of subsamples in which peaks were called as significant by the GLMs or QNB. Boxes span the 1<sup>st</sup> to 3<sup>rd</sup> quartiles, with medians indicated. Whiskers show the minimum and maximum points within ±1.5x the interquartile distance from the boxes. Results for each subsample of replicates are shown as jittered points.

356

357

358 We next assessed the correlation between m<sup>6</sup>A enrichment observed using MeRIP-seq and  
359 MeRIP-RT-qPCR using data from our recent work that identified 58 peak changes in m<sup>6</sup>A in Huh7 cells  
360 following infection by four different viruses (50). For those experiments, we again selected peaks that  
361 change based on results from the union of QNB and the GLM approaches. We found that the magnitude  
362 of changes in common among viruses correlated between MeRIP-seq and MeRIP-RT-qPCR, both across  
363 peaks (Pearson's  $R = 0.57$ ,  $p = 3.7E-6$ ) and within single peaks across viruses (13 out of 19 peaks  
364 showed positive correlations, four of which had p-values  $< 0.05$  with three data points) (**Figure 5c**,  
365 **Additional File 2: Supplementary Figure 5**). Given the correlation we found between MeRIP-seq and  
366 MeRIP-RT-qPCR, it is unclear why changes in IP over input sequencing reads were undetectable at the  
367 peaks reported by Bertero et al. (2018) and Huang et al. (2019) but differences in peaks were  
368 successfully validated using MeRIP-RT-qPCR (22,70). Based on these discrepancies, while MeRIP-RT-  
369 qPCR can be used as an initial method of validation for predicted peak changes, additional methods are  
370 necessary to confirm quantitative differences in m<sup>6</sup>A levels and to resolve points where the assays do not  
371 agree.

372 We next used our peaks validated with MeRIP-RT-qPCR to estimate the number of replicates  
373 necessary for detection of changes with either the GLM or QNB methods. Using a permutation test, we  
374 downsampled infected and uninfected replicates and reran statistical detection of changes. We found that  
375 approximately 6-9 replicates were necessary for consistent detection (in at least 50% of subsamples) of  
376 most peak changes (**Figure 5d**). Schurch et al. (2016) and Conesa et al. (2016) produced similar  
377 recommendations for basic RNA-seq studies, finding that 6-12 replicates were necessary to detect most  
378 changes in gene expression and that changes of 1.25 were detectable 25% of the time with five  
379 replicates, rising to 44% with ten replicates, respectively (36,77). While our findings broadly agree with  
380 these recommendations for RNA-seq, they also suggest that almost all published MeRIP-seq studies to  
381 date are underpowered.

382

383 **Discussion**

384 In the eight years since MeRIP-/m<sup>6</sup>A-seq was first published (16,17), many studies have used  
385 these methods to examine the function of m<sup>6</sup>A, its distribution along mRNA transcripts, and how it might  
386 be regulated under various conditions. While 35 out of 64 of the MeRIP- and miCLIP-seq papers we  
387 surveyed (**Additional File 1: Supplementary Table 1**) refer to m<sup>6</sup>A as “dynamic”, and, by contrast, only  
388 two describe the modification as “static”, the literature is unclear on what is meant by the word “dynamic”.  
389 There is mixed evidence as to whether m<sup>6</sup>A is reversible through demethylation by the proposed  
390 demethylases FTO and ALKBH5 (71,78–80). Recent research using an endoribonuclease-based method  
391 for m<sup>6</sup>A detection suggests that ALKBH5 has only a mild suppressive effect on m<sup>6</sup>A levels and FTO no  
392 effect (54). Although m<sup>6</sup>A does not appear to change over the course of an mRNA’s lifetime at steady-  
393 state (3), whether it changes in response to a particular stimulus and at what point is less clear. Some  
394 studies have suggested that m<sup>6</sup>A may be modulated through changes in methyltransferase and  
395 demethylase expression, producing consistent directions of change across transcripts (8,23,34), through  
396 alternative mechanisms involving microRNA, transcription factors, promoters, or histone marks  
397 (21,22,66,70,81), or through indeterminate mechanisms (17,20,25–28,52). However, based on our  
398 reanalysis of available MeRIP-seq data, there is still only meagre support for widespread changes in m<sup>6</sup>A  
399 across the transcriptome independent of changes in the expression of methylation machinery (e.g.  
400 increases or decreases in METTL3 expression).

401 In particular, replication of peaks and changes in peaks across studies is limited. As with other  
402 RNA IP-based methods, MeRIP-seq data contains noise, owing to technical and biological variation (82).  
403 In fact, while peak overlaps reach ~80% between replicates of the same study, they decrease to a  
404 median of 45% between studies, most of which use 2-3 replicates each (**Figure 1**). Given that the  
405 detection of peaks is so variable and that peak heights differ among replicates, it is perhaps not surprising  
406 that peak changes have yet to be reproduced between multiple studies of similar conditions. Indeed,  
407 variability in MeRIP-seq could also mask differences in m<sup>6</sup>A regulation among cell types, which have  
408 been described in mouse brains (34) and in cell lines exposed to KSHV (28). To distinguish biological and  
409 technical variation, it will therefore be particularly important to test if multiple groups using the same cell  
410 line and conditions can better reproduce changes in m<sup>6</sup>A.

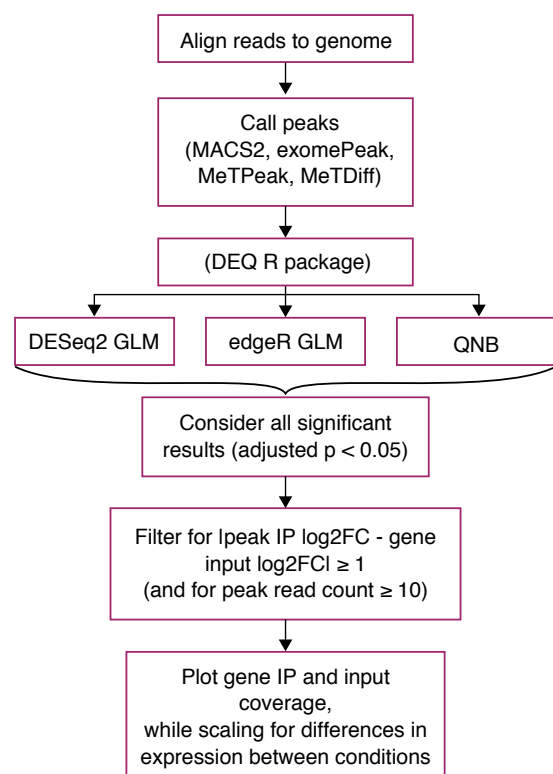

**Figure 6: Proposed approach to identify candidates for m<sup>6</sup>A<sub>(m)</sub> changes for further validation using MeRIP-seq data.** We suggest predicting changes in m<sup>6</sup>A<sub>(m)</sub> using DESeq2, edgeR, and QNB, and have implemented the DEQ package in R to facilitate this.

411  
412 Disparities in the methods used to detect changes in m<sup>6</sup>A<sub>(m)</sub> peaks also play a role in differing  
413 conclusions among studies. Here, we analyzed four statistical methods to detect changes in peaks and  
414 found that three of these methods showed uniform or conservatively shifted p-value distributions and  
415 were able to identify changes in m<sup>6</sup>A<sub>(m)</sub> independent of changes in gene expression. We therefore  
416 suggest that these statistical methods, in combination with filters for input levels in both conditions and  
417 the difference in log<sub>2</sub> fold change between peaks and genes, can be used to identify candidate m<sup>6</sup>A<sub>(m)</sub>  
418 sites from MeRIP-seq data for further analysis and validation (**Figure 6**). Based on our results, while  
419 MeTDiff works for peak detection, we do not recommend MeTDiff for peak change detection as it does  
420 not control well for differences in gene expression (**Figure 3**). Similar to others (33), we found that plotting  
421 predicted m<sup>6</sup>A changes was invaluable and that appropriate scaling for gene coverage could reveal  
422 changes proportional to gene expression. In addition, plotting the standard deviation in transcript  
423 coverage can help assess typical variation in peak height among replicates. We note that both differential  
424 methylation of a gene and methylation of a gene that is differentially expressed could be important, but  
425 they should not be conflated when considering the role of m<sup>6</sup>A in transcript regulation.

426           The extent to which m<sup>6</sup>A changes on particular transcripts and whether it changes in binary  
427 presence/absence or in degree is unclear. MeRIP-RT-qPCR could detect methylation differences in in  
428 vitro transcribed RNA. Further, we found that these changes correlated with differences in MeRIP-seq  
429 enrichment. However, neither MeRIP-seq nor MeRIP-RT-qPCR can reveal the precise fraction of  
430 transcript copies modified by m<sup>6</sup>A. In general, antibody-based methods are subject to biases, including  
431 from differences in binding efficiencies based on RNA structure and motif preferences (83). There is an  
432 oft-cited but little-used method for quantification of m<sup>6</sup>A, site-specific cleavage and radioactive-labeling  
433 followed by ligation-assisted extraction and thin-layer chromatography (SCARLET) (19). However, this  
434 method can be challenging, works only for highly abundant transcripts, and is impractical for  
435 transcriptome-wide analysis. A recently developed endoribonuclease-based, antibody-independent  
436 approach for m<sup>6</sup>A detection is promising in terms of quantification of m<sup>6</sup>A, but its use is limited to a subset  
437 of m<sup>6</sup>A sites within DRAC motifs ending in ACA (~16% of all sites) (44,45). So far, comparison to this data  
438 suggests that antibody-based approaches may underestimate the number of m<sup>6</sup>A sites (54). Alternative  
439 methods to detect m<sup>6</sup>A based using single-molecule sequencing (including direct RNA sequencing and  
440 real-time cDNA synthesis) are under development and may offer ways to detect, quantify, and phase m<sup>6</sup>A  
441 sites, but these have not yet been shown to accurately detect m<sup>6</sup>A across a cellular transcriptome (84–  
442 86). For now, site-specific SCARLET is the only option to biochemically validate proposed changes in  
443 m<sup>6</sup>A at most motifs.

444

445

## 446 **Conclusions**

447           Our work reveals the limits of MeRIP-seq reproducibility for the detection of m<sup>6</sup>A<sub>(m)</sub> and in  
448 particular suggests caution when using MeRIP-seq for the detection of changes in m<sup>6</sup>A<sub>(m)</sub>. To increase  
449 confidence in predicted changes in m<sup>6</sup>A<sub>(m)</sub>, we propose statistical approaches that account for differences  
450 in gene expression between conditions and variability among replicates. These methods can be used to  
451 gain insight into the regulation and function of m<sup>6</sup>A<sub>(m)</sub> and to predict specific sites for validation before the

452 development of high-throughput alternatives to MeRIP-seq, and similar strategies may be applicable to  
453 other types of RNA sequencing assay.

454

## 455 **Methods**

### 456 *New MeRIP-seq data*

#### 457 *- Huh7 data*

458 Total RNA was extracted from Huh7 cells using Trizol (Thermo-Fisher). mRNA was purified from 200 µg  
459 total RNA using the Dynabeads mRNA purification kit (Thermo-Fisher) and concentrated by ethanol  
460 precipitation. Purified mRNA was fragmented using the RNA Fragmentation Reagent (Thermo-Fisher) for  
461 15 minutes followed by ethanol precipitation. Then, MeRIP was performed using EpiMark N6-  
462 methyladenosine Enrichment kit (NEB). 25 µL Protein G Dynabeads (Thermo-Fisher) per sample were  
463 washed three times in MeRIP buffer (150 mM NaCl, 10 mM Tris-HCl, pH 7.5, 0.1% NP-40) and incubated  
464 with 1 µL anti-m<sup>6</sup>A antibody (NEB) for 2 hours at 4°C with rotation. After washing three times, anti-m<sup>6</sup>A  
465 conjugated beads were incubated with purified mRNA with rotation at 4°C overnight in 300 µL MeRIP  
466 buffer with 1 µL RNase inhibitor (recombinant RNasein; Promega). Beads were then washed twice with  
467 500 µL MeRIP buffer, twice with low salt wash buffer (50 mM NaCl, 10 mM Tris-HCl, pH 7.5, 0.1% NP-  
468 40), twice with high salt wash buffer (500 mM NaCl, 10 mM Tris-HCl, pH 7.5, 0.1% NP-40), and once  
469 again with MeRIP buffer. m<sup>6</sup>A-modified RNA was eluted twice in 100 µL MeRIP buffer containing 5mM  
470 m<sup>6</sup>A salt (Santa Cruz Biotechnology) for 30 minutes at 4°C with rotation and concentrated by ethanol  
471 precipitation. RNA-seq libraries were prepared from eluate and the 10% of RNA set aside as input using  
472 the TruSeq mRNA library prep kit (Illumina) and checked for fragment length using the Agilent 2100  
473 Bioanalyzer. Single-end 50 base pair reads were sequenced on an Illumina HiSeq 2500.

#### 474 *- Heat shock*

475 Early passage OCI-Ly1 diffuse large B-cell lymphoma cells were grown in Iscove's modified Eagle  
476 Medium (IMDM) with 10% fetal bovine serum (FBS). OCI-Ly1 cells were obtained from the Ontario  
477 Cancer Institute and regularly tested for *Mycoplasma* contamination by PCR and identified by single  
478 nucleotide polymorphism. Cells were maintained with 1% penicillin/streptomycin in a 37°C, 5% CO<sub>2</sub>,

479 humidified incubator. In these growing conditions, heat shocked cells were exposed to 43 °C for 1 hour,  
480 followed by 1 hour of recovery at 37°C while control cells were maintained at 37°C. Following treatment,  
481 cells were processed at 4°C to obtain total cell lysates. Lysates were immunoprecipitated for m<sup>6</sup>A<sub>(m)</sub> using  
482 Synaptic Systems antibody (SYSY 202 003) following the protocol described in Meyer, et al (2012) and  
483 sequenced on an Illumina HiSeq 2500 (16).

484

#### 485 *Read processing*

486 Reads were trimmed using Trimmomatic (87) and aligned to the human genome (hg38) or the mouse  
487 genome (mm10), as appropriate, using STAR, a splice-aware aligner for RNA-seq data (72). We used the  
488 flag “--outFilterMultimapNmax 1” to keep only uniquely aligned reads. Scripts used for alignment are  
489 provided with the rest of the analysis scripts at [https://github.com/al-mcintyre/merip\\_reanalysis\\_scripts](https://github.com/al-mcintyre/merip_reanalysis_scripts).

490

#### 491 *Peak detection and comparison*

492 IP over input peaks were called using MACS2 callpeak using the parameters “--nomodel --extsize 100 (or,  
493 if available, the approximate fragment size for a specific experiment to extend reads at their 3’ ends to a  
494 fixed length) --gsize 100e6 (the approximate size of mouse and human transcriptomes based on gencode  
495 annotations)” (49). No filter for coverage was applied at the stage of peak detection. Transcript coverage  
496 was estimated using Kallisto (88) with an index construct 31mers, except for the Schwartz et al (2014)  
497 data set, where the reads were too short and an alternative index based on 29mers was constructed (33).

498 For **Figure 1b**, the full union of unique peaks was taken and the percent of that set detected in single  
499 replicates calculated. Intersects between peaks that overlapped for transcripts with  $\geq 10X$  mean coverage  
500 in both samples were taken using bedtools (89) for **Figure 2**, allowing a generous minimum of 1  
501 overlapping base. Heatmaps for peak overlaps were generated using the ComplexHeatmap package in R  
502 (90). MeRIP-seq data sets in **Figure 2b** included those for human cell lines in **Figure 2a**, other data sets  
503 from the same studies and any data sets that shared the same cell lines, and other data sets that looked  
504 at multiple human cell types. We considered only data sets from baseline conditions in **Figure 2**  
505 (untreated cells and knockdown controls).



506

507 *Poisson and negative binomial fits*

508 Reads aligned to peaks were counted using featureCounts from the Rsubread package (91). Poisson and  
509 negative binomial models were fit to input and IP read counts at peaks using maximum likelihood  
510 estimation. Simulated read counts were generated with Poisson or negative binomial distributions based  
511 on estimated parameters from the sample, with 500 random generations per model. The log likelihood of  
512 seeing read counts from the sample and the simulations given the model parameters was then calculated  
513 and the mean taken across all peaks.

514

515 *Peak change detection and generalized linear models*

516 Generalized linear models to detect changes in IP coverage while controlling for differences in input  
517 coverage were implemented based on a method previously applied to HITS-CLIP data (58). Full and  
518 reduced models were constructed as follows:

$$519 \log \mu_{ij} = \beta_i^0 + \beta_i^{\text{IP}} X_j^{\text{IP}} + \beta_i^{\text{STIM}} X_j^{\text{STIM}} + \beta_i^{\text{STIM:IP}} X_j^{\text{STIM:IP}}$$

$$520 \log \mu_{ij} = \beta_i^0 + \beta_i^{\text{IP}} X_j^{\text{IP}} + \beta_i^{\text{STIM}} X_j^{\text{STIM}}$$

521

522 Where  $\mu_{ij}$  is the expected read count for peak  $i$  in sample  $j$ , modelled as a negative binomial distribution,  
523  $X_j^{\text{IP}} = 1$  for IP samples and 0 for input samples, and  $X_j^{\text{STIM}} = 1$  for samples under the experimental  
524 intervention and 0 for control samples.

525

526 Statistical significance was then assessed using a chi-squared test ( $df=1$ ) for the difference in deviances  
527 between the full and reduced models, with the null hypothesis that the interaction term ( $\beta_i^{\text{STIM:IP}}$ ) for  
528 differential antibody enrichment driven by the experimental intervention is zero. The likelihood ratio test  
529 was implemented through DESeq2 (56) and edgeR (57), two programs developed for RNA-seq analysis  
530 that differ in how they filter data and in how they estimate dispersions for negative binomial distributions.  
531 Generalized linear models implemented through edgeR included a term for the normalized library size of  
532 sample  $j$ .

533

534 QNB was run as suggested for experiments with biological replicates, where each IP and input variable  
535 ("ip1", etc.) consisted of a matrix of peak counts for either condition 1 or condition 2:

```
536 > qnbtest(ip1, ip2, input1, input2, mode="per-condition")
```

537

538 We extracted functions from MeTDiff so that we could supply our own peaks and thus control for  
539 differences in peak detection among tools. The main post-peak calling function, `diff.call.module`, was run  
540 as follows using the same count matrices as for QNB:

```
541 > diff.call.module(ip1, input1, ip2, input2)
```

542

543 Gene and peak expression changes were estimated as  $\log_2$  fold changes from DESeq2 based on  
544 differences in input read counts aligned to genes and IP read counts aligned to peaks, respectively, and  
545 the change in peak relative to gene enrichment was calculated as the absolute difference in  $\log_2$  fold  
546 change between those values.

547

#### 548 *Comparison to published studies*

549 The sources for published estimates of m<sup>6</sup>A peak changes included in our comparison are listed in  
550 **Additional File 1: Supplementary Table 4**. Significant (FDR-adjusted  $p < 0.05$ ) peaks were considered  
551 for DESeq2, edgeR, and QNB, run as described above. We also considered a filtered set of peaks  
552 derived from the union of significant peaks from the three tools with additional filters for location within  
553 exons,  $\log_2$  fold change between peak IP and gene input  $\geq 1$ , and a minimum peak read count of 10  
554 across replicates and conditions. We used gProfiler to calculate enrichment of functional categories (92).

555

556 In **Figure 4b-c**, we selected *Hspa1a/HSPA1A* as our representative gene for heat shock because it was  
557 the primary example cited by Zhou et al. (2015) and Meyer et al. (2015) (4,20). For HIV, we selected  
558 *PSIP1* because it was among the 56 genes reported by Lichinchi et al. (2016a) (25), it plays a known role  
559 in HIV infection, and we detected a peak in the gene using MACS2.

560

561 For KSHV, we compared significant results (adjusted  $p < 0.05$ ) from QNB and GLMs (DESeq2 and  
562 edgeR), with additional filtering for lpeak IP – gene input  $\log_2$  fold change  $\geq 1$  (lowering this threshold to  
563 0.5 did not change results), for data from Hesser et al. (2018) (27) in lytic vs. latent iSLK.219 cells and  
564 data from Tan et al. (2018) (28) in lytic vs. latent iSLK BAC16 cells. We used the same approach to  
565 compare data from Rubio et al. (2018) and Winkler et al. (2019) (75,76) for response to dsDNA. Data sets  
566 used for site-specific comparisons are summarized in **Additional File 1: Supplementary Table 5**.

567

568 Gene coverage was plotted using CovFuzze (<https://github.com/al-mcintyre/CovFuzze>), which  
569 summarizes mean and standard deviation in coverage across available replicates (93). Pearson's  
570 correlations were taken for **Supplementary Figure 4** for peaks expressed above a minimum input peak  
571 read count of 10 across replicates and conditions.

572

### 573 *Spike-in controls and MeRIP-RT-qPCR*

574 In vitro transcribed (IVT) controls were provided by the Jaffrey Lab and consisted of 1001 base long RNA  
575 sequences with three adenines in GAC motifs (**Additional File 1: Supplementary Table 6**) either fully  
576 methylated or unmethylated. m<sup>6</sup>A and A controls were mixed in various ratios (1:9, 3:7, and 9:1) that  
577 approximate the variation in m<sup>6</sup>A levels detected by SCARLET (m<sup>6</sup>A levels at specific sites have been  
578 reported to vary from 6-80% of transcripts (19)). Modified and unmodified standards were mixed at the  
579 indicated ratios to yield a final quantity of 0.1 fmol, 1 fmol, and 10 fmol. Mixed RNA standards were added  
580 to 30  $\mu$ g total RNA from Huh7 cells, along with 0.1 fmol of positive (m<sup>6</sup>A-modified *Gaussia* luciferase  
581 RNA, "GLuc") and negative control (unmodified *Cypridina* luciferase, "CLuc") spike-in RNA provided with  
582 the N6-methyladenosine Enrichment kit (EpiMark). Following MeRIP as described above, cDNA was  
583 synthesized from eluate and input samples using the iScript cDNA synthesis kit (Bio-Rad), and RT-qPCR  
584 was performed on a QuantStudio Flex 6 instrument. Data was analyzed as a percent of input of the spike-  
585 in RNA in each condition relative to that of the provided positive control spike-in.

586 For MeRIP-RT-qPCR to test peak callers, Huh7 cells plated in 6-well plates were transfected with  
587 siRNAs against METTL3 and METTL14 (Qiagen; SI04317096 and SI00459942) or non-targeting control  
588 siRNA (SI03650318) using Lipofectamine RNAiMax (Thermo Fisher) twice, 24 hours apart. 48 hours  
589 following the second round of siRNA transfection, cells were harvested in TRIzol reagent and total RNA  
590 was extracted. 30 µg total RNA was fragmented for 3 mins at 75°C, concentrated by ethanol precipitation,  
591 and MeRIP-RT-qPCR was performed as described above. Primers used for RT-qPCR are provided in  
592 **Additional File 1: Supplementary Table 7** and siRNA sequences in **Additional File 1: Supplementary**  
593 **Table 8.**

594  
595 *Cell culture and infection (data used for MeRIP-RT-qPCR comparisons)*

596 Huh7 cells were grown in DMEM (Mediatech) supplemented with 10% fetal bovine serum (HyClone), 2.5  
597 mM HEPES, and 1X non-essential amino acids (Thermo-Fisher). The identity of the Huh7 cell lines was  
598 verified using the Promega GenePrint STR kit (DNA Analysis Facility, Duke University), and cells were  
599 verified as mycoplasma free by the LookOut Mycoplasma PCR detection kit (Sigma). Infectious stocks of  
600 a cell culture-adapted strain of genotype 2A JFH1 HCV were generated and titered on Huh7.5 cells by  
601 focus-forming assay (FFA), as described (94). Dengue virus (DENV2-NGC), West Nile virus (WNV-  
602 NY2000), and Zika virus (ZIKV-PRVABC59) viral stocks were generated in C6/36 cells and titered on  
603 Vero cells as described (94). All viral infections were performed at a multiplicity of infection of 1 for 48  
604 hours.

605  
606 **Declarations**

607 **Ethics approval and consent to participate**

608 Not applicable

609 **Consent for publication**

610 Not applicable

### 611 **Availability of Data and Materials**

612 MeRIP-seq data for the Huh7 negative controls is available in the GEO repository, under accession  
613 number GSE130891. MeRIP-seq data for heat shock in B-cell lymphoma is available under accession  
614 number GSE130892. Accession numbers for all other data sets reanalyzed in the study are included in  
615 Additional File 1: Supplementary Tables 1-5. Scripts used for analysis are available at  
616 [https://github.com/al-mcintyre/merip\\_reanalysis\\_scripts](https://github.com/al-mcintyre/merip_reanalysis_scripts) and a pipeline implementing generalized linear  
617 models through DESeq2 and edgeR, as well as QNB, is provided at <https://github.com/al-mcintyre/deq>.

### 618 **Competing interests**

619 C.E.M. is a cofounder and board member for Biotia and Onegevity Health, as well as an advisor or  
620 compensated speaker for Abbvie, Acuamark Diagnostics, ArcBio, BioRad, DNA Genotek, Genialis,  
621 Genpro, Karius, Illumina, New England Biolabs, QIAGEN, Whole Biome, and Zymo Research.

### 622 **Funding**

623 We are grateful for funding from the Starr Cancer Consortium (I9-A9-071), the Bert L and N. Kuggie Vallee  
624 Foundation, the WorldQuant Foundation, The Pershing Square Sohn Cancer Research Alliance, NASA  
625 (NNX14AH50G), the National Institutes of Health (R01AI125416, R21AI129851, R01MH117406), the  
626 Leukemia and Lymphoma Society (LLS) grants (LLS 9238-16, Mak, LLS-MCL-982, Chen-Kiang), the  
627 Burroughs Wellcome Fund (S.M.H.), the National Science and Engineering Research Council of Canada  
628 (A.B.R.M. PGS-D funding), and the American Heart Association (N.S.G. Pre-doctoral Fellowship,  
629 17PRE33670017).

### 630 **Authors' contributions**

631 A.B.R.M. and C.E.M. conceived the study. A.B.R.M. developed and ran the analyses and wrote the  
632 manuscript with N.S.G. and S.M.H. S.R.J. provided in vitro controls for MeRIP-RT-qPCR. N.S.G.  
633 prepared MeRIP-seq libraries for the Huh7 controls and ran MeRIP-RT-qPCR tests. L.C. contributed  
634 additional heat shock data. All authors read and edited the manuscript.

## 635 **Acknowledgements**

636 We would like to thank Christina Leslie and Jonathan Victor for statistical advice, Aashiq Mirza for the  
637 MeRIP-RT-qPCR controls, and Helen Lazear for WNV infection. We would also like to thank the  
638 Epigenomics Core at Weill Cornell for preparing MeRIP-seq libraries, the Scientific Computing Unit  
639 (SCU), and New England Biolabs for donating anti-m<sup>6</sup>A antibodies.

640

## 641 **References**

- 642 1. Balacco DL, Soller M. The m<sup>6</sup>A Writer: Rise of a Machine for Growing Tasks. *Biochemistry*. 2019;
- 643 2. Ke S, Alemu EA, Mertens C, Gantman EC, Fak JJ, Mele A, et al. A majority of m<sup>6</sup>A residues are in  
644 the last exons, allowing the potential for 3' UTR regulation. *Genes & development*. 2015;
- 645 3. Ke S, Pandya-Jones A, Saito Y, Fak JJ, Vågbo CB, Geula S, et al. m<sup>6</sup>A mRNA modifications are  
646 deposited in nascent pre-mRNA and are not required for splicing but do specify cytoplasmic  
647 turnover. *Genes & Development*. 2017;31(10):990–1006.
- 648 4. Meyer KD, Patil DP, Zhou J, Zinoviev A, Skabkin MA, Elemento O, et al. 5' UTR m<sup>6</sup>A promotes cap-  
649 independent translation. *Cell*. 2015;163(4):999–1010.
- 650 5. Wang X, Zhao BS, Roundtree IA, Lu Z, Han D, Ma H, et al. N<sup>6</sup>-methyladenosine modulates  
651 messenger RNA translation efficiency. *Cell*. 2015;161(6):1388–99.
- 652 6. Lin S, Choe J, Du P, Triboulet R, Gregory RI. The m<sup>6</sup>A methyltransferase METTL3 promotes  
653 translation in human cancer cells. *Molecular cell*. 2016;62(3):335–45.
- 654 7. Wang Y, Li Y, Toth JI, Petroski MD, Zhang Z, Zhao JC. N<sup>6</sup>-methyladenosine modification  
655 destabilizes developmental regulators in embryonic stem cells. *Nature cell biology*. 2014;16(2):191.
- 656 8. Molinie B, Wang J, Lim KS, Hillebrand R, Lu Z, Van Wittenberghe N, et al. m<sup>6</sup>A-LAIC-seq reveals  
657 the census and complexity of the m<sup>6</sup>A epitranscriptome. *Nature methods*. 2016;13(8):692.

- 658 9. Yoon K-J, Ringeling FR, Vissers C, Jacob F, Pokrass M, Jimenez-Cyrus D, et al. Temporal control of  
659 mammalian cortical neurogenesis by m6A methylation. *Cell*. 2017;171(4):877–89.
- 660 10. Meyer KD, Jaffrey SR. Rethinking m6A readers, writers, and erasers. *Annual review of cell and*  
661 *developmental biology*. 2017;33:319–42.
- 662 11. Roundtree IA, Evans ME, Pan T, He C. Dynamic RNA modifications in gene expression regulation.  
663 *Cell*. 2017;169(7):1187–200.
- 664 12. Rosa-Mercado NA, Withers JB, Steitz JA. Settling the m6A debate: methylation of mature mRNA is  
665 not dynamic but accelerates turnover. *Genes & development*. 2017;31(10):957–8.
- 666 13. Darnell RB, Ke S, Darnell JE. Pre-mRNA processing includes N6 methylation of adenosine residues  
667 that are retained in mRNA exons and the fallacy of “RNA epigenetics.” *RNA*. 2018;24(3):262–7.
- 668 14. Zhao BS, Nachtergaele S, Roundtree IA, He C. Our views of dynamic N6-methyladenosine RNA  
669 methylation. *RNA*. 2018;24(3):268–72.
- 670 15. Mauer J, Jaffrey SR. FTO, m6Am, and the hypothesis of reversible epitranscriptomic mRNA  
671 modifications. *FEBS letters*. 2018;592(12):2012–22.
- 672 16. Meyer KD, Saletore Y, Zumbo P, Elemento O, Mason CE, Jaffrey SR. Comprehensive analysis of  
673 mRNA methylation reveals enrichment in 3' UTRs and near stop codons. *Cell*. 2012;149(7):1635–  
674 46.
- 675 17. Dominissini D, Moshitch-Moshkovitz S, Schwartz S, Salmon-Divon M, Ungar L, Osenberg S, et al.  
676 Topology of the human and mouse m 6 A RNA methylomes revealed by m 6 A-seq. *Nature*.  
677 2012;485(7397):201.
- 678 18. Linder B, Grozhik AV, Olarerin-George AO, Meydan C, Mason CE, Jaffrey SR. Single-nucleotide-  
679 resolution mapping of m6A and m6Am throughout the transcriptome. *Nature methods*.  
680 2015;12(8):767.
- 681 19. Liu N, Parisien M, Dai Q, Zheng G, He C, Pan T. Probing N6-methyladenosine RNA modification  
682 status at single nucleotide resolution in mRNA and long noncoding RNA. *Rna*. 2013;
- 683 20. Zhou J, Wan J, Gao X, Zhang X, Jaffrey SR, Qian S-B. Dynamic m 6 A mRNA methylation directs  
684 translational control of heat shock response. *Nature*. 2015;526(7574):591.
- 685 21. Chen T, Hao Y-J, Zhang Y, Li M-M, Wang M, Han W, et al. m6A RNA Methylation Is Regulated by  
686 MicroRNAs and Promotes Reprogramming to Pluripotency. *Cell Stem Cell*. 2015 Mar 5;16(3):289–  
687 301.
- 688 22. Bertero A, Brown S, Madrigal P, Osnato A, Ortmann D, Yiangou L, et al. The SMAD2/3 interactome  
689 reveals that TGFβ controls m 6 A mRNA methylation in pluripotency. *Nature*. 2018;555(7695):256.
- 690 23. Liu J, Eckert MA, Harada BT, Liu S-M, Lu Z, Yu K, et al. m 6 A mRNA methylation regulates AKT  
691 activity to promote the proliferation and tumorigenicity of endometrial cancer. *Nature cell biology*.  
692 2018;20(9):1074.
- 693 24. Anders M, Chelysheva I, Goebel I, Trenkner T, Zhou J, Mao Y, et al. Dynamic m6A methylation  
694 facilitates mRNA triaging to stress granules. *Life science alliance*. 2018;1(4):e201800113.

- 695 25. Lichinchi G, Gao S, Saletore Y, Gonzalez GM, Bansal V, Wang Y, et al. Dynamics of the human and  
696 viral m6A RNA methylomes during HIV-1 infection of T cells. *Nature Microbiology*. 2016;1.
- 697 26. Lichinchi G, Zhao BS, Wu Y, Lu Z, Qin Y, He C, et al. Dynamics of human and viral RNA methylation  
698 during Zika virus infection. *Cell host & microbe*. 2016;20(5):666–73.
- 699 27. Hesser CR, Karijolich J, Dominissini D, He C, Glaunsinger BA. N6-methyladenosine modification and  
700 the YTHDF2 reader protein play cell type specific roles in lytic viral gene expression during Kaposi's  
701 sarcoma-associated herpesvirus infection. *PLoS pathogens*. 2018;14(4):e1006995.
- 702 28. Tan B, Liu H, Zhang S, da Silva SR, Zhang L, Meng J, et al. Viral and cellular N 6-methyladenosine  
703 and N 6, 2'-O-dimethyladenosine epitranscriptomes in the KSHV life cycle. *Nature microbiology*.  
704 2018;3(1):108.
- 705 29. Vu LP, Pickering BF, Cheng Y, Zaccara S, Nguyen D, Minuesa G, et al. The N 6-methyladenosine (m  
706 6 A)-forming enzyme METTL3 controls myeloid differentiation of normal hematopoietic and  
707 leukemia cells. *Nature medicine*. 2017;23(11):1369.
- 708 30. Liu L, Zhang S-W, Huang Y, Meng J. QNB: differential RNA methylation analysis for count-based  
709 small-sample sequencing data with a quad-negative binomial model. *BMC bioinformatics*.  
710 2017;18(1):387.
- 711 31. Cui X, Zhang L, Meng J, Rao MK, Chen Y, Huang Y. MeTDiff: a novel differential RNA methylation  
712 analysis for MeRIP-seq data. *IEEE/ACM Transactions on Computational Biology and Bioinformatics*  
713 (TCBB). 2018;15(2):526–34.
- 714 32. Zhao X, Yang Y, Sun B-F, Shi Y, Yang X, Xiao W, et al. FTO-dependent demethylation of N6-  
715 methyladenosine regulates mRNA splicing and is required for adipogenesis. *Cell research*.  
716 2014;24(12):1403.
- 717 33. Schwartz S, Mumbach MR, Jovanovic M, Wang T, Maciag K, Bushkin GG, et al. Perturbation of m6A  
718 writers reveals two distinct classes of mRNA methylation at internal and 5' sites. *Cell reports*.  
719 2014;8(1):284–96.
- 720 34. Engel M, Eggert C, Kaplick PM, Eder M, Röh S, Tietze L, et al. The role of m6A/m-RNA methylation  
721 in stress response regulation. *Neuron*. 2018;99(2):389–403.
- 722 35. Zhou J, White KP, Liu Y. RNA-seq differential expression studies: more sequence or more  
723 replication? *Bioinformatics*. 2013 Dec 4;30(3):301–4.
- 724 36. Schurch NJ, Schofield P, Gierliński M, Cole C, Sherstnev A, Singh V, et al. How many biological  
725 replicates are needed in an RNA-seq experiment and which differential expression tool should you  
726 use? *Rna*. 2016;22(6):839–51.
- 727 37. Su Z, Łabaj PP, Li S, Thierry-Mieg J, Thierry-Mieg D, Shi W, et al. A comprehensive assessment of  
728 RNA-seq accuracy, reproducibility and information content by the Sequencing Quality Control  
729 Consortium. *Nature biotechnology*. 2014;32(9):903.
- 730 38. Geula S, Moshitch-Moshkovitz S, Dominissini D, Mansour AA, Kol N, Salmon-Divon M, et al. m6A  
731 mRNA methylation facilitates resolution of naïve pluripotency toward differentiation. *Science*.  
732 2015;347(6225):1002–6.



- 733 39. Cui Q, Shi H, Ye P, Li L, Qu Q, Sun G, et al. m6A RNA methylation regulates the self-renewal and  
734 tumorigenesis of glioblastoma stem cells. *Cell reports*. 2017;18(11):2622–34.
- 735 40. Ma C, Chang M, Lv H, Zhang Z-W, Zhang W, He X, et al. RNA m 6 A methylation participates in  
736 regulation of postnatal development of the mouse cerebellum. *Genome biology*. 2018;19(1):68.
- 737 41. Su R, Dong L, Li C, Nachtergaele S, Wunderlich M, Qing Y, et al. R-2HG exhibits anti-tumor activity  
738 by targeting FTO/m6A/MYC/CEBPA signaling. *Cell*. 2018;172(1–2):90–105.
- 739 42. Zeng Y, Wang S, Gao S, Soares F, Ahmed M, Guo H, et al. Refined RIP-seq protocol for  
740 epitranscriptome analysis with low input materials. *PLoS biology*. 2018;16(9):e2006092.
- 741 43. Zhou J, Wan J, Shu XE, Mao Y, Liu X-M, Yuan X, et al. N6-methyladenosine guides mRNA  
742 alternative translation during integrated stress response. *Molecular cell*. 2018;69(4):636–47.
- 743 44. Garcia-Campos MA, Edelheit S, Toth U, Shachar R, Nir R, Lasman L, et al. Deciphering the m6A  
744 code via quantitative profiling of m6A at single-nucleotide resolution. *BioRxiv*. 2019;571679.
- 745 45. Zhang Z, Chen L-Q, Zhao Y-L, Yang C-G, Roundtree IA, Zhang Z, et al. Single-base mapping of m6A  
746 by an antibody-independent method. *bioRxiv*. 2019;575555.
- 747 46. Liu H, Begik O, Lucas MC, Mason CE, Schwartz S, Mattick JS, et al. Accurate detection of m6A RNA  
748 modifications in native RNA sequences. *bioRxiv*. 2019;525741.
- 749 47. Meng J, Lu Z, Liu H, Zhang L, Zhang S, Chen Y, et al. A protocol for RNA methylation differential  
750 analysis with MeRIP-Seq data and exomePeak R/Bioconductor package. *Methods*.  
751 2014;69(3):274–81.
- 752 48. Cui X, Meng J, Zhang S, Chen Y, Huang Y. A novel algorithm for calling mRNA m 6 A peaks by  
753 modeling biological variances in MeRIP-seq data. *Bioinformatics*. 2016;32(12):i378–85.
- 754 49. Zhang Y, Liu T, Meyer CA, Eeckhoute J, Johnson DS, Bernstein BE, et al. Model-based analysis of  
755 ChIP-Seq (MACS). *Genome biology*. 2008;9(9):R137.
- 756 50. Gokhale NS, McIntyre ABR, Mattocks MD, Holley CL, Lazear HM, Mason CE, et al. Altered m6A  
757 modification of specific cellular transcripts affects Flaviviridae infection. *bioRxiv*. 2019 Jan 1;670984.
- 758 51. Antanaviciute A, Baquero-Perez B, Watson CM, Harrison SM, Lascelles C, Crinnion L, et al.  
759 m6aViewer: software for the detection, analysis, and visualization of N6-methyladenosine peaks  
760 from m6A-seq/ME-RIP sequencing data. *RNA*. 2017;23(10):1493–501.
- 761 52. He S, Wang H, Liu R, He M, Che T, Jin L, et al. mRNA N6-methyladenosine methylation of postnatal  
762 liver development in pig. *PLoS one*. 2017;12(3):e0173421.
- 763 53. Tao X, Chen J, Jiang Y, Wei Y, Chen Y, Xu H, et al. Transcriptome-wide N 6-methyladenosine  
764 methylome profiling of porcine muscle and adipose tissues reveals a potential mechanism for  
765 transcriptional regulation and differential methylation pattern. *BMC genomics*. 2017;18(1):336.
- 766 54. Garcia-Campos MA, Edelheit S, Toth U, Safra M, Shachar R, Viukov S, et al. Deciphering the “m6A  
767 Code” via Antibody-Independent Quantitative Profiling. *Cell*. 2019 Jul 25;178(3):731-747.e16.
- 768 55. Xiao S, Cao S, Huang Q, Xia L, Deng M, Yang M, et al. The RNA N6-methyladenosine modification  
769 landscape of human fetal tissues. *Nature Cell Biology*. 2019 May 1;21(5):651–61.

- 770 56. Love MI, Huber W, Anders S. Moderated estimation of fold change and dispersion for RNA-seq data  
771 with DESeq2. *Genome biology*. 2014;15(12):550.
- 772 57. Robinson MD, McCarthy DJ, Smyth GK. edgeR: a Bioconductor package for differential expression  
773 analysis of digital gene expression data. *Bioinformatics*. 2010;26(1):139–40.
- 774 58. Park S-M, Deering RP, Lu Y, Tivnan P, Lianoglou S, Al-Shahrour F, et al. Musashi-2 controls cell  
775 fate, lineage bias, and TGF- $\beta$  signaling in HSCs. *Journal of Experimental Medicine*.  
776 2014;211(1):71–87.
- 777 59. Marioni JC, Mason CE, Mane SM, Stephens M, Gilad Y. RNA-seq: an assessment of technical  
778 reproducibility and comparison with gene expression arrays. *Genome research*. 2008;18(9):1509–  
779 17.
- 780 60. Batista PJ, Molinie B, Wang J, Qu K, Zhang J, Li L, et al. m6A RNA modification controls cell fate  
781 transition in mammalian embryonic stem cells. *Cell stem cell*. 2014;15(6):707–19.
- 782 61. Fustin J-M, Doi M, Yamaguchi Y, Hida H, Nishimura S, Yoshida M, et al. RNA-methylation-dependent  
783 RNA processing controls the speed of the circadian clock. *Cell*. 2013;155(4):793–806.
- 784 62. Hess ME, Hess S, Meyer KD, Verhagen LA, Koch L, Brönneke HS, et al. The fat mass and obesity  
785 associated gene (*Fto*) regulates activity of the dopaminergic midbrain circuitry. *Nature*  
786 *neuroscience*. 2013;16(8):1042.
- 787 63. Li Z, Weng H, Su R, Weng X, Zuo Z, Li C, et al. FTO plays an oncogenic role in acute myeloid  
788 leukemia as a N6-methyladenosine RNA demethylase. *Cancer cell*. 2017;31(1):127–41.
- 789 64. Huang H, Weng H, Sun W, Qin X, Shi H, Wu H, et al. Recognition of RNA N 6-methyladenosine by  
790 IGF2BP proteins enhances mRNA stability and translation. *Nature cell biology*. 2018;20(3):285.
- 791 65. Zhong X, Yu J, Frazier K, Weng X, Li Y, Cham CM, et al. Circadian Clock Regulation of Hepatic Lipid  
792 Metabolism by Modulation of m6A mRNA Methylation. *Cell reports*. 2018;25(7):1816–28.
- 793 66. Barbieri I, Tzelepis K, Pandolfini L, Shi J, Millán-Zambrano G, Robson SC, et al. Promoter-bound  
794 METTL3 maintains myeloid leukaemia by m 6 A-dependent translation control. *Nature*.  
795 2017;552(7683):126.
- 796 67. SEQC/MAQC-III Consortium, Su Z, Łabaj PP, Li S, Thierry-Mieg J, Thierry-Mieg D, et al. A  
797 comprehensive assessment of RNA-seq accuracy, reproducibility and information content by the  
798 Sequencing Quality Control Consortium. *Nature Biotechnology*. 2014 Aug 24;32:903.
- 799 68. Li M, Zhao X, Wang W, Shi H, Pan Q, Lu Z, et al. Ythdf2-mediated m 6 A mRNA clearance  
800 modulates neural development in mice. *Genome biology*. 2018;19(1):69.
- 801 69. Wen J, Lv R, Ma H, Shen H, He C, Wang J, et al. Zc3h13 regulates nuclear RNA m 6 A methylation  
802 and mouse embryonic stem cell self-renewal. *Molecular cell*. 2018;69(6):1028–38.
- 803 70. Huang H, Weng H, Zhou K, Wu T, Zhao BS, Sun M, et al. Histone H3 trimethylation at lysine 36  
804 guides m 6 A RNA modification co-transcriptionally. *Nature*. 2019;1.
- 805 71. Zheng G, Dahl JA, Niu Y, Fedorcsak P, Huang C-M, Li CJ, et al. ALKBH5 is a mammalian RNA  
806 demethylase that impacts RNA metabolism and mouse fertility. *Molecular cell*. 2013;49(1):18–29.

- 807 72. Dobin A, Davis CA, Schlesinger F, Drenkow J, Zaleski C, Jha S, et al. STAR: ultrafast universal RNA-  
808 seq aligner. *Bioinformatics*. 2013;29(1):15–21.
- 809 73. Dominissini D, Moshitch-Moshkovitz S, Schwartz S, Salmon-Divon M, Ungar L, Osenberg S, et al.  
810 Topology of the human and mouse m<sup>6</sup>A RNA methylomes revealed by m<sup>6</sup>A-seq. *Nature*.  
811 2012;485(7397):201.
- 812 74. Tirumuru N, Zhao BS, Lu W, Lu Z, He C, Wu L. N<sup>6</sup>-methyladenosine of HIV-1 RNA regulates viral  
813 infection and HIV-1 Gag protein expression. *Elife*. 2016;5:e15528.
- 814 75. Rubio RM, Depledge DP, Bianco C, Thompson L, Mohr I. RNA m<sup>6</sup>A modification enzymes shape  
815 innate responses to DNA by regulating interferon  $\beta$ . *Genes & development*. 2018;32(23–24):1472–  
816 84.
- 817 76. Winkler R, Gillis E, Lasman L, Safra M, Geula S, Soyris C, et al. m<sup>6</sup>A modification controls the  
818 innate immune response to infection by targeting type I interferons. *Nature immunology*.  
819 2019;20(2):173.
- 820 77. Conesa A, Madrigal P, Tarazona S, Gomez-Cabrero D, Cervera A, McPherson A, et al. A survey of  
821 best practices for RNA-seq data analysis. *Genome Biology*. 2016 Jan 26;17(1):13.
- 822 78. Jia G, Fu Y, Zhao X, Dai Q, Zheng G, Yang Y, et al. N<sup>6</sup>-methyladenosine in nuclear RNA is a major  
823 substrate of the obesity-associated FTO. *Nature chemical biology*. 2011;7(12):885.
- 824 79. Wei J, Liu F, Lu Z, Fei Q, Ai Y, He PC, et al. Differential m<sup>6</sup>A, m<sup>6</sup>Am, and m<sup>1</sup>A demethylation  
825 mediated by FTO in the cell nucleus and cytoplasm. *Molecular cell*. 2018;71(6):973–85.
- 826 80. Mauer J, Luo X, Blanjoie A, Jiao X, Grozhik AV, Patil DP, et al. Reversible methylation of m<sup>6</sup>A m  
827 in the 5' cap controls mRNA stability. *Nature*. 2017;541(7637):371.
- 828 81. Aguilo F, Zhang F, Sancho A, Fidalgo M, Di Cecilia S, Vashisht A, et al. Coordination of m<sup>6</sup>A mRNA  
829 methylation and gene transcription by ZFP217 regulates pluripotency and reprogramming. *Cell stem*  
830 *cell*. 2015;17(6):689–704.
- 831 82. Chakrabarti AM, Haberman N, Praznik A, Luscombe NM, Ule J. Data science issues in studying  
832 Protein–RNA interactions with CLIP technologies. *Annual Review of Biomedical Data Science*.  
833 2018;1:235–61.
- 834 83. Liu B, Merriman DK, Choi SH, Schumacher MA, Plangger R, Kreutz C, et al. A potentially abundant  
835 junctional RNA motif stabilized by m<sup>6</sup>A and Mg<sup>2+</sup>. *Nature Communications*. 2018 Jul 17;9(1):2761.
- 836 84. Saletore Y, Meyer K, Korlach J, Vilfan ID, Jaffrey S, Mason CE. The birth of the Epitranscriptome:  
837 deciphering the function of RNA modifications. *Genome Biology*. 2012;13(10):175.
- 838 85. Garalde DR, Snell EA, Jachimowicz D, Sipos B, Lloyd JH, Bruce M, et al. Highly parallel direct RNA  
839 sequencing on an array of nanopores. *Nature Methods*. 2018 Jan 15;15:201.
- 840 86. Liu H, Begik O, Lucas MC, Ramirez JM, Mason CE, Wiener D, et al. Accurate detection of m<sup>6</sup>A RNA  
841 modifications in native RNA sequences. *Nature Communications*. 2019 Sep 9;10(1):4079.
- 842 87. Bolger AM, Lohse M, Usadel B. Trimmomatic: a flexible trimmer for Illumina sequence data.  
843 *Bioinformatics*. 2014;30(15):2114–20.

- 844 88. Bray NL, Pimentel H, Melsted P, Pachter L. Near-optimal probabilistic RNA-seq quantification. *Nature*  
845 *biotechnology*. 2016;34(5):525.
- 846 89. Quinlan AR, Hall IM. BEDTools: a flexible suite of utilities for comparing genomic features.  
847 *Bioinformatics*. 2010;26(6):841–2.
- 848 90. Gu Z, Eils R, Schlesner M. Complex heatmaps reveal patterns and correlations in multidimensional  
849 genomic data. *Bioinformatics*. 2016;32(18):2847–9.
- 850 91. Liao Y, Smyth GK, Shi W. The R package Rsubread is easier, faster, cheaper and better for  
851 alignment and quantification of RNA sequencing reads. *Nucleic Acids Research*. 2019 Feb  
852 20;47(8):e47–e47.
- 853 92. Reimand J, Arak T, Adler P, Kolberg L, Reisberg S, Peterson H, et al. g: Profiler—a web server for  
854 functional interpretation of gene lists (2016 update). *Nucleic acids research*. 2016;44(W1):W83–9.
- 855 93. Imam H, Khan M, Gokhale NS, McIntyre AB, Kim G-W, Jang JY, et al. N6-methyladenosine  
856 modification of hepatitis B virus RNA differentially regulates the viral life cycle. *Proceedings of the*  
857 *National Academy of Sciences*. 2018;115(35):8829–34.
- 858 94. Gokhale NS, McIntyre ABR, McFadden MJ, Roder AE, Kennedy EM, Gandara JA, et al. N6-  
859 methyladenosine in Flaviviridae viral RNA genomes regulates infection. *Cell host & microbe*. 2016  
860 Nov;

861

862

863

864

865

866

867

868

869

870

871

872 **Additional file 1:** Supplementary Tables. (xls)

873 **Additional file 2:** Supplementary Figures. (pdf)

874 **Additional file 3:** Results with MeTDiff peak caller. (pdf)

875 **Additional file 4:** Peaks and statistical test results for experiments in Figures 3-4. (zip)

876 **Additional file 5:** Response to reviewers. (txt)
